## Efficient Homology-directed Repair with Circular ssDNA Donors

Sukanya Iyer<sup>1\*</sup>, Aamir Mir<sup>2\*§</sup>, Joel Vega-Badillo<sup>2</sup>, Benjamin P. Roscoe<sup>1†</sup>, Raed Ibraheim<sup>2</sup>, Lihua Julie Zhu<sup>1,3</sup>, Jooyoung Lee<sup>2</sup>, Pengpeng Liu<sup>1</sup>, Kevin Luk<sup>1</sup>, Esther Mintzer<sup>1</sup>, Josias Soares de Brito<sup>1</sup>, Philip D. Zamore<sup>2,4</sup>, Erik J. Sontheimer<sup>2,5,6</sup> and Scot A. Wolfe<sup>1,6</sup>

**\*These authors contributed equally**

### Author affiliations

<sup>1</sup>*Department of Molecular, Cell and Cancer Biology, University of Massachusetts Medical School, Worcester, Massachusetts, USA.*

<sup>2</sup>*RNA Therapeutics Institute, University of Massachusetts Medical School, Worcester, Massachusetts, USA*

<sup>3</sup>*Program in Bioinformatics and Integrative Biology, University of Massachusetts Medical School, Worcester, Massachusetts, USA*

<sup>4</sup>*Howard Hughes Medical Institute, University of Massachusetts Medical School, Worcester, Massachusetts, USA.*

<sup>5</sup>*Program in Molecular Medicine, University of Massachusetts Medical School, Worcester, Massachusetts, USA*

<sup>6</sup>*Li Weibo Institute for Rare Disease Research, University of Massachusetts Medical School, Worcester, Massachusetts, USA.*

*Correspondence should be addressed to E.J.S. (erik.sontheimer@umassmed.edu) or S.A.W. (scot.wolfe@umassmed.edu).*

*§Present address: Inscripta, Inc., 7060 Koll Center Parkway, Suite 312, Pleasanton, CA 94566, USA*

*† Present address: COGEN Therapeutics, Cambridge, MA, USA*

### Abstract

While genome editing has been revolutionized by the advent of CRISPR-based nucleases, difficulties in achieving efficient, nuclease-mediated, homology-directed repair (HDR) still limit many applications. Commonly used DNA donors such as plasmids suffer from low HDR efficiencies in many cell types, as well as integration at unintended sites. In contrast, single-stranded DNA (ssDNA) donors can produce efficient HDR with minimal off-target integration. Here, we describe the use of ssDNA phage to efficiently and inexpensively produce long circular ssDNA (cssDNA) donors. These cssDNA donors serve as efficient HDR templates when used with Cas9 or Cas12a, with integration frequencies superior to linear ssDNA (lssDNA) donors. To evaluate the relative efficiencies of imprecise and precise repair for a suite of different Cas9 or Cas12a nucleases, we have developed a modified Traffic Light Reporter (TLR) system [TLR-

44 Multi-Cas Variant 1 (MCV1)] that permits side-by-side comparisons of different nuclease  
45 systems. We used this system to assess editing and HDR efficiencies of different nuclease  
46 platforms with distinct DNA donor types. We then extended the analysis of DNA donor  
47 types to evaluate efficiencies of fluorescent tag knock-ins at endogenous sites in  
48 HEK293T and K562 cells. Our results show that cssDNA templates produce efficient  
49 and robust insertion of reporter tags. Targeting efficiency is high, allowing production of  
50 biallelic integrants using cssDNA donors. cssDNA donors also outcompete lssDNA  
51 donors in template-driven repair at the target site. These data demonstrate that circular  
52 donors provide an efficient, cost-effective method to achieve knock-ins in mammalian cell  
53 lines.

54

## 55 **Introduction**

56

57 RNA-guided Cas9<sup>1-3</sup> and Cas12a proteins<sup>4, 5</sup> have provided a facile tool for introducing  
58 targeted breaks within genomes. These double-strand breaks (DSBs) can be harnessed to  
59 engineer the genome through endogenous DNA repair pathways. Typically, DSBs are  
60 precisely repaired via the canonical non-homologous end joining (c-NHEJ) pathway,  
61 restoring the original DNA sequence.<sup>4</sup> However, in the context of a programmable  
62 nuclease where DSB generation can reoccur, imprecise DNA repair may produce small  
63 insertions and deletions (indels) via c-NHEJ as well as alt-NHEJ pathways.<sup>6</sup> In contrast to  
64 the imprecise nature of these indels, the homology-directed repair (HDR) pathway results  
65 in precise rewriting of the genome in a template-dependent manner.<sup>7-9</sup> HDR is often  
66 utilized in the context of programmable nucleases to introduce specific changes to the  
67 genome, such as adding fluorescent tags to proteins<sup>10</sup> or making a precise therapeutic  
68 correction to the desired locus.<sup>11-13</sup> Given the broad utility of this technology for enabling  
69 precise insertions into mammalian genomes, several viral and non-viral approaches for  
70 the delivery of donor DNA into mammalian cells have been described.<sup>14-17</sup> The nature of  
71 the template employed for HDR is dictated in part by the length of the desired genomic  
72 modification. For short insertions (<200 nt), ssDNA oligonucleotides harboring the  
73 mutation, as well as flanking homology arms that range from 35-60 nucleotides, are  
74 introduced into cells along with Cas9 protein and guide RNA.<sup>15, 18, 19</sup> When modifications  
75 longer than 200bp are desired, double-stranded DNA (dsDNA) templates such as  
76 plasmids or PCR products are typically used as donor templates. However, these double-  
77 stranded templates are often associated with high cellular toxicity and off-target  
78 integration events.<sup>20</sup> As an alternative to using dsDNA templates as donors for HDR,  
79 long ssDNA templates have been reported to have low cytotoxicity and high efficiencies  
80 of targeted integration at the site of interest.<sup>21, 22</sup> Consequently, there is considerable  
81 interest in developing methods to generate long ssDNA templates to serve as donors for  
82 making targeted insertions in mammalian cells. Several recent examples include  
83 asymmetric PCR, “Strandase” enzyme-mediated removal of one strand of a linear  
84 dsDNA template [Takara Bio USA (catalogue number 632644)], use of pairs of nicking  
85 endonucleases followed by gel extraction of resulting ssDNA [Biodynamics Laboratory  
86 Inc. (catalogue number DS615) and reverse transcription (RT)-based approaches to  
87 generate ssDNA.<sup>21-24</sup> Most of these approaches require expensive and time-consuming  
88 purification steps to ensure complete removal of truncated ssDNA products. With RT-  
89 based approaches in particular, it is challenging to generate accurate ssDNA donors

90 longer than 3-4 kb, especially in large molar quantities, because of the lack of  
91 proofreading activity and the limited processivity of reverse transcriptase enzymes.

92  
93 As an alternative to these *in vitro* approaches, we explored the use of circular ssDNA  
94 (cssDNA) produced from phagemids as templates for HDR-mediated integration of DNA  
95 cassettes. Phagemid vectors have been used to generate ssDNA templates for site-directed  
96 mutagenesis<sup>25</sup>, DNA nanotechnology and DNA origami<sup>26</sup>, phage display technology for  
97 protein engineering<sup>27</sup> and as templates for transcription in cell-free systems.<sup>28</sup> However,  
98 to our knowledge, their use as donors for achieving targeted integration of DNA in  
99 mammalian cells has not been evaluated.

100  
101 Here, we show that phagemid-derived cssDNA can be used to insert sequences efficiently  
102 and precisely in mammalian cells. We further compared HDR efficiencies obtained with  
103 phagemid-sourced cssDNA to those of linear ssDNAs (lssDNAs) generated using a RT-  
104 based method<sup>22</sup> and a streptavidin affinity purification approach with asymmetrically  
105 biotinylated PCR amplicons.<sup>29</sup> To this end, we utilized a redesigned traffic light reporter  
106 system to evaluate HDR efficiencies for different forms of donor templates (plasmids,  
107 lssDNAs and cssDNAs) when used in conjunction with SpyCas9 or three different Cas12a  
108 effectors delivered as ribonucleoproteins (RNPs) in HEK293T and K562 cells. We then  
109 compared knock-in yields of linear and circular ssDNA donor templates containing  
110 fluorescent reporter tags at four different endogenous sites in the human genome. Finally,  
111 we demonstrated the ability of circular ssDNA templates to create biallelic integration of  
112 a reporter cassette in different cell lines. Overall, our data show broad utility of cssDNA  
113 as donors for genome engineering applications.

114  
115

## 116 **Results**

117

### 118 **Generating linear and circular ssDNA templates for HDR in mammalian** 119 **cells**

120 To address the challenges associated with long ssDNA donor production, we investigated  
121 a number of different approaches for generating ssDNA donors, as well as the relative  
122 efficiencies of HDR when using the resulting ssDNA products. While most efforts to  
123 generate ssDNA donors have focused on linear molecules, we explored the properties of  
124 circular ssDNAs as donors for HDR. Phagemids are chimeric vectors that contain  
125 plasmid and bacteriophage origins of replication. Upon superinfection of the host  
126 bacteria with helper phage to supply the phage DNA replication machinery, one strand  
127 of the phagemid vector is packaged into bacteriophage particles and extruded into the  
128 media from whence circular ssDNA can be purified<sup>30</sup> (Supplementary Fig. S1A).  
129 Although a standard protocol to purify ssDNA from phagemids yielded reasonable  
130 quantities of DNA, we observed the presence of contaminating *Escherichia coli* genomic  
131 DNA in the ssDNA preparation, as reported previously.<sup>31</sup> To remove contaminating *E.*  
132 *coli* genomic DNA in preparation for donor DNA transfection into mammalian cells, we  
133 modified a purification protocol described by Viera and Messing<sup>30</sup>, where we  
134 incorporated a DNase I digestion step prior to bacteriophage uncoating and subsequently  
135 purified the cssDNA using an anion exchange column.

136

137 To provide a benchmark for aspects of donor DNA production and direct comparison of  
138 HDR rates in mammalian cells, we also evaluated two methods for generating lssDNA  
139 templates. First, lssDNA was generated using a published RT method (T-lssDNA) in  
140 which cDNA is generated by a processive reverse transcriptase such as TGIRT-III.<sup>32</sup> RT-  
141 based approaches (Supplementary Fig. S1B) can be effective for generating ssDNA  
142 donors up to 3.5 kb in length.<sup>21, 22, 33, 34</sup> However, the reverse transcriptase enzymes used  
143 for generating linear ssDNA generally lack proofreading activity<sup>35</sup>, which makes the  
144 fidelity of the resulting template a concern.<sup>24</sup> In addition, these enzymes often generate  
145 truncated ssDNA products (Supplementary Table S1) and yields of full-length ssDNA  
146 products, particularly for templates with stable secondary structures, have been found to  
147 be compromised.<sup>36</sup> As an alternative to RT-based methods, we reasoned that ssDNA  
148 templates generated from asymmetrically biotinylated PCR products would produce  
149 longer ssDNA templates with higher sequence fidelity. Accordingly, we utilized an  
150 approach to generate ssDNA templates using biotin-based affinity purification of ssDNA  
151 (B-lssDNA) by exploiting the biotin-streptavidin interaction. In this method, one PCR  
152 primer used for donor amplification is biotinylated, which allows the resulting PCR  
153 product to be strand-specifically bound to streptavidin-coated beads. Subsequently, the  
154 DNA strands are separated by alkaline denaturation and the non-biotinylated strand is  
155 isolated and used as a donor for HDR (Supplementary Fig. S1C). SsDNA templates  
156 generated by all these methods were treated with S1 nuclease to confirm the single-  
157 stranded nature of the templates generated (Supplementary Fig. S1D). Overall, while all  
158 three approaches yielded ssDNA up to at least 3,300 bases in length, the phagemid-based  
159 approach proved to be most economical while also generating large quantities of full-  
160 length ssDNA for use as HDR templates (Table 1).

161

### 162 **Traffic Light Reporter Multi-Cas Variant 1 (TLR-MCV1): a system to** 163 **evaluate genome-editing efficiency by multiple nucleases**

164

165 Previously, Certo *et al.* described a traffic light reporter (TLR) system that provides  
166 positive fluorescence readouts for both error-prone DSB repair as well as precise HDR  
167 repair.<sup>37</sup> It consists of a tandem expression cassette consisting of a “broken” GFP coding  
168 sequence followed by an out-of-frame mCherry cassette (Figure 1A). The GFP sequence  
169 is disrupted by an insertion harboring various nuclease target sites to initiate DSB  
170 formation. DSB repair by pathways such as NHEJ can result in insertions or deletions  
171 (indels) that place the downstream mCherry coding sequence in frame for productive  
172 translation (+1 frameshift). In addition, precise HDR repair of the locus can be evaluated  
173 by co-delivering a truncated GFP donor repair template with a nuclease, which will  
174 restore GFP expression while leaving the mCherry coding sequence out of frame. The  
175 fraction of GFP- and mCherry-positive cells can be rapidly measured using flow  
176 cytometry to determine editing outcomes as a function of the nuclease and donor DNA  
177 composition. We redesigned the original TLR reporter to incorporate target sites for  
178 several currently characterized nucleases (Figure 1A) by introducing protospacer adjacent  
179 motifs (PAMs) belonging to Cas9/Cas12a orthologs from *Streptococcus pyogenes* (SpyCas9)<sup>38</sup>,  
180 <sup>39</sup>, *Neisseria meningitidis* (Nme1Cas9 and Nme2Cas9)<sup>40-42</sup>, *Campylobacter jejuni* (CjeCas9)<sup>43-45</sup>,  
181 *Staphylococcus aureus* (SauCas9)<sup>46</sup>, *Geobacillus stearothermophilus* (GeoCas9)<sup>47</sup>, *Lachnospiraceae*  
182 bacterium ND2006 (LbaCas12a)<sup>48</sup>, *Acidaminococcus* sp. (AspCas12a)<sup>48</sup> and *Francisella*  
183 *novicida* (FnoCas12).<sup>49</sup> For several of the Cas9 orthologs (SpyCas9, Nme1Cas9, CjeCas9



184 and SauCas9), DSB formation can be targeted to the exact same position. We also  
185 incorporated a second SpyCas9 target site on the opposite strand such that both SpyCas9  
186 target sites will produce a DSB at the same position. Similarly, the Cas12a orthologs have  
187 overlapping PAMs in the incorporated target site and therefore will generate staggered  
188 cuts within the same region. All of these target sites were combined into a sequence  
189 framework that lacks stop codons in the +1 reading frame to enable mCherry expression  
190 following the induction of a suitable indel. Hence, our updated reporter (TLR-MCV1)  
191 provides a useful platform for direct comparison of genome editing properties of the  
192 major RNA-guided genome editing tools described to date.

193

194 A single copy of TLR-MCV1 was introduced into HEK293T and K562 cells by lentiviral  
195 transduction. Using plasmid transfections of HEK293T cells to introduce the nucleases,  
196 guide RNA (listed in Supplementary Table S2) and a plasmid donor template (pCVL-  
197 SFFV-d14GFP-Donor; Supplementary Table S3), we observed that all the Cas9/Cas12a  
198 sites can be targeted by the cognate nucleases to induce precise and imprecise genome  
199 editing in mammalian cells (Supplementary Fig. S2A). The two GeoCas9-expressing  
200 plasmids produced inefficient editing, which may be due to suboptimal codon usage, or to  
201 GeoCas9's preference for higher temperatures, or both.<sup>47</sup> We also performed a dose-  
202 dependence analysis to test the potency of different nucleases (Supplementary Fig. S2B).  
203 SpyCas9 was found to be the most potent nuclease for the production of frameshifts that  
204 restore mCherry expression.

205

## 206 **Circular ssDNA donors outperform linear ssDNA donors for HDR**

207

208 TLR-MCV1 provides an ideal system for direct comparisons of different DNA donor  
209 architectures since both the NHEJ and HDR efficiencies can be measured using different  
210 Cas nucleases at the same locus. To create DSBs in cells, delivery of Cas9 or Cas12a  
211 RNPs has gained favor because these complexes can be readily electroporated into a wide  
212 variety of cell types.<sup>50-53</sup> Furthermore, due to their rapid turnover in cells, Cas9/Cas12a  
213 RNPs display lower off-target activity than other delivery modalities without  
214 compromising on-target editing activity, thereby significantly improving the specificity of  
215 targeted genomic modifications.<sup>51, 54</sup> Delivery of SpyCas9 protein complexed with its  
216 guide RNA (SpyCas9 RNPs), or each of the three Cas12a orthologs as RNPs, proved  
217 highly effective at editing the TLR-MCV1 reporter, with indel efficiencies greater than  
218 70% achieved as measured by TIDE<sup>55</sup> (Supplementary Fig. S3). Next, we tested different  
219 types of ssDNA donors or a plasmid donor with SpyCas9 and AspCas12a RNPs. As  
220 shown in Figure 1B, cssDNA elicited higher HDR efficiencies relative to equimolar  
221 quantities of linear ssDNA donors or the plasmid donor in both K562 and HEK293T  
222 cells. Using cssDNA, we achieved a statistically significant ~2-fold increase in HDR yields  
223 compared to lssDNA (Supplementary Table S4). This was true for both SpyCas9 and  
224 AspCas12a-based editing. CssDNA also achieved higher GFP integration efficiencies in  
225 comparison to plasmid donors in both K562 and HEK293T cells. Notably, we did not  
226 observe a significant difference between T-lssDNA and B-lssDNA donor efficiency in  
227 K562 cells ( $p = 0.0797$ ), indicating that lssDNAs generated using two different  
228 approaches were largely indistinguishable once generated and purified (Supplementary  
229 Table S4). There was a statistically significant difference ( $p = 0.03$ ) between T-lssDNA  
230 and B-lssDNA when tested in HEK293T cells with AspCas12a. However, the increase

231 shown by T-*lssDNA* relative to B-*lssDNA* is modest (<4%). Overall, among the different  
232 forms of DNA templates tested, *cssDNA* realized the highest HDR efficiencies.

233

234 The improved efficiency of knock-in using *cssDNA* may be due to increased exonuclease  
235 protection afforded by the circular nature of the *ssDNA*. To test this hypothesis, we  
236 circularized the *lssDNA* by splint-mediated ligation and tested this circularized form in  
237 TLR-MCV1 cells (Supplementary Fig. S4A). Circularization of linear *ssDNA* resulted in  
238 significant ( $p < 0.0001$ ) enhancement of HDR relative to the unligated precursor in both  
239 the cell lines (Supplementary Fig. S4B, Supplementary Table S4) and comparable  
240 efficiencies to those observed with phagemid-derived *cssDNA* donors. This is consistent  
241 with previous studies that demonstrated improved function of end-protected nucleic acids  
242 in various cell types.<sup>56</sup>

243

### 244 **Cas12a nucleases produce superior HDR yields at the TLR-MCV1 locus**

245

246 Cas12a-based genome editing has been reported to achieve increased HDR, relative to  
247 SpyCas9, since it generates 5' overhangs and more rapidly releases the PAM-distal DNA  
248 end following cleavage.<sup>57</sup> As shown in Figure 1B, in HEK293T cells the HDR efficiency  
249 as a fraction of total editing ( $[GFP/(GFP + mCherry)]$ , referred to hereafter as the “HDR  
250 ratio”) with all the donors tested was higher for AspCas12a compared to SpyCas9. By  
251 contrast, we did not observe increases in the HDR ratio of editing with AspCas12a  
252 compared to SpyCas9 in K562 cells. To explore this observation further, we tested  
253 different orthologs of Cas12a with *lssDNA* and *cssDNA* donors. Since we had previously  
254 observed no substantial difference between B-*lssDNA* and T-*lssDNA* in HDR efficiency  
255 at the TLR-MCV1 locus, we only included T-*lssDNA* for the subsequent comparisons in  
256 TLR-MCV1-related experiments. Efficacy of different SpyCas9 and Cas12a nucleases for  
257 driving HDR showed cell-line-specific differences. The LbaCas12a and FnoCas12a  
258 variants yielded higher HDR ratios relative to SpyCas9 (Figure 1C) in both HEK293T  
259 and K562 cells. With AspCas12a, however, while HDR ratios are increased in  
260 HEK293T cells, a similar increase in HDR ratios was not observed in K562 cells. In  
261 HEK293T cells, SpyCas9 supported HDR percentages of 18% and 9.5% with *cssDNA*  
262 and *lssDNA* donors, respectively (Figure 1C, lower panel). Cas12a orthologs increased  
263 HDR percentages to 25-31% with *cssDNA* template and 12-21% with linear *ssDNA*  
264 donor. Among the Cas12a orthologs tested, LbaCas12a and FnoCas12a showed higher  
265 HDR ratios compared to AspCas12a with *cssDNA*. In K562 cells, the same trends were  
266 generally observed, with the exception of editing efficiencies for AspCas12. In K562 cells,  
267 the HDR ratio increased from 0.5 with SpyCas9 to 0.7-0.8 with LbaCas12a and  
268 FnoCas12a when using the *cssDNA* donor (Supplementary Fig. S5). Thus, in these cells  
269 the HDR pathway was predominantly being harnessed for DSB repair during Cas12a-  
270 mediated genome editing with the *cssDNA* donor. The overall HDR ratio with the linear  
271 *ssDNA* donor increased to approximately 0.5 with LbaCas12a and FnoCas12a  
272 (Supplementary Fig. S5). However, AspCas12a did not show similar enhancements in  
273 HDR ratio in K562 cells. Taken together these results indicate that Cas12a orthologs  
274 may be superior for template-dependent HDR genome editing when compared to  
275 SpyCas9.

276

277 **The effect of donor orientation is dependent on cell type and nuclease**  
278 **identity**  
279

280 There are conflicting reports in the literature regarding the effect of DNA strand  
281 orientation on HDR efficiencies. A bias in HDR efficiency towards ssDNA donors that  
282 have the same sequence as the target strand (i.e. the strand base-paired to the SpyCas9  
283 RNA guide) has been reported.<sup>18, 58</sup> However, others have not observed a significant  
284 effect of strand orientation on HDR efficiency.<sup>15, 57, 59</sup> To examine strand-specific donor  
285 bias in HDR efficiencies in TLR-MCV1 cells, we generated target-strand-complementary  
286 (sense) and non-target-strand-complementary (antisense) ssDNA donors for both linear  
287 and circular DNAs and electroporated them along with SpyCas9 and AspCas12a RNPs.  
288 For both effectors, the guide RNA was complementary to the antisense strand of the  
289 TLR-MCV1 reporter. In K562-TLR-MCV1 cells, there were no significant differences  
290 between sense and antisense ssDNA donors except in the case of AspCas12a and cssDNA  
291 donors (Figure 1D). For this effector/donor combination, there was about a 2-fold  
292 increase in HDR efficiency with the sense cssDNA donor relative to antisense cssDNA  
293 donor. On the other hand, electroporated HEK293T cells exhibited higher HDR yields  
294 ( $p < 0.008$ ) with sense cssDNA donors when used with both SpyCas9 and AspCas12a.  
295 The increase in the HDR efficiency with sense cssDNA relative to antisense cssDNA was  
296 7% and 13% when cells were electroporated with SpyCas9 and AspCas12a, respectively.  
297 To examine if the two different guide orientations relative to the coding region of the  
298 TLR-MCV1 sequence influence the ssDNA donor orientation preference for HDR for  
299 SpyCas9 in K562 cells, we electroporated cssDNA and lssDNA donors that were  
300 complementary to the TLR-MCV1 sense or the antisense strand, in combination with  
301 guide RNAs that were likewise complementary to either TLR-MCV1 target site strand  
302 (Supplementary Fig. S6A). We did not observe any significant differences in HDR  
303 efficiency as a function of relative guide/donor strand orientation (Supplementary Fig.  
304 S6B). Overall, while there are nuclease- and cell-type-specific differences HDR  
305 efficiencies, the relative orientation of the donor does not have a consistent impact on  
306 HDR-based editing. This is consistent with previously described ssDNA donor strand  
307 biases in HDR efficiencies, which are generally locus- and cell type-specific<sup>19</sup>.

308  
309 **Circular ssDNA donors are more potent than lssDNA donors for HDR**  
310

311 We reasoned that the higher nuclease stability of cssDNA donors may improve the  
312 potency of cssDNA compared to lssDNA donors. To test this hypothesis, cells were  
313 electroporated with increasing amounts of ssDNA donors while keeping the amount of  
314 SpyCas9 or AspCas12a RNPs constant (Figure 1E). In K562 cells, the HDR yields  
315 peaked around 1pmol of cssDNA for both SpyCas9 and AspCas12a. We also observe  
316 severe apparent DNA toxicity at higher donor DNA concentrations ( $>1$  pmoles of  
317 cssDNA) resulting in reduction of HDR efficiencies. Since overall cssDNA templates are  
318 about 4-5 times longer due to the presence of the phagemid sequence elements, it's likely  
319 that DNA toxicity is associated with the total mass of DNA delivered instead of moles of  
320 DNA templates electroporated. Even so, the lssDNA donor did not perform as well as the  
321 cssDNA donor in stimulating HDR even at the highest concentration that was tested in  
322 K562 cells. The highest HDR efficiency observed for the lssDNA was about 5% with  
323 SpyCas9 and 7% with AspCas12a which is four and two times lower than what was

324 achieved with the cssDNA donor and SpyCas9 and AspCas12a respectively. These results  
325 were also mirrored in HEK293T cells, where the cssDNA donor was more potent  
326 compared to lssDNA donor. With AspCas12a, cssDNA reached saturation at around 2  
327 pmols, whereas 5 pmols was needed to achieve the same effect with SpyCas9. Above  
328 these donor DNA levels, we observed a drop in HDR efficiencies, presumably due to  
329 DNA toxicity. The lssDNA donor performed poorly with SpyCas9 since the percentage  
330 of GFP-positive cells with 20 pmoles of donor was still ~10% lower despite using 3-fold  
331 more moles of donor. The lssDNA performed better with AspCas12a where HDR  
332 efficiencies of ~30% were achieved with 20 pmoles of lssDNA donor. However, to  
333 achieve the same HDR yields, 5-fold more moles of lssDNA was needed compared to  
334 cssDNA donor. Hence, cssDNA is more potent than lssDNA for HDR and its effect is  
335 further enhanced when employing AspCas12a as the nuclease. Collectively, the TLR-  
336 MCV1-based experiments reveal that cssDNA donors are more efficient at promoting  
337 HDR repair compared to lssDNA donors.

338

### 339 **Circular ssDNA donors provide efficient templates for fluorescent tagging** 340 **of endogenous proteins**

341

342 For many functional genomic studies and gene therapy applications, targeted insertion of  
343 long DNA cassettes into endogenous loci is desirable. Most studies aimed at making  
344 targeted insertions of long DNA cassettes employ plasmid donors to provide the template  
345 for precise insertion.<sup>10</sup> However, plasmid donors can be toxic to target cells, which makes  
346 insertion of long DNA cassettes an inefficient process in most cell types.<sup>16</sup> To test the  
347 suitability of cssDNA for integrating larger inserts, we chose four endogenous genes in the  
348 mammalian genome based on the work of Roberts *et al.*<sup>10</sup> and He *et al.*<sup>60</sup> to make targeted  
349 insertions of fluorescent proteins (Figure 2A). SpyCas9 RNPs were complexed with  
350 chemically synthesized guide RNAs (listed in Supplementary Table S2) with terminal  
351 modifications to enhance intracellular stability. Electroporation of RNPs in the absence of  
352 donor DNA into HEK293T cells yielded 80-93% indels at the four sites as measured by  
353 TIDE analysis<sup>55</sup> (Supplementary Fig. S7), indicating efficient SpyCas9 editing of each  
354 endogenous locus. It should be noted that while guides targeting *ACTB*, *TOMM20* and  
355 *GAPDH* loci are complementary to the sense strand, the *SEC61B* targeting guide is  
356 complementary to the antisense strand. To evaluate the relative efficiency of targeted  
357 insertion by cssDNA and lssDNA, we tagged three endogenous ORFs (*SEC61B*,  
358 *TOMM20* and *ACTB*) via a direct fusion of mEGFP (Figure 2A). At the *GAPDH* locus, we  
359 inserted an IRES-EGFP cassette to facilitate separate expression of both gene products  
360 from the modified locus.<sup>60</sup> To evaluate the impact of the donor cassette sequence  
361 composition on HDR efficiency, the GFP tag was replaced with a red fluorescence tag  
362 (dTomato/iTag RFP) in a corresponding donor set. Phagemid-derived cssDNA or T-  
363 lssDNA donors encoding the fluorescence tag flanked by 1kb homology arms were  
364 electroporated into K562 and HEK293T cells along with SpyCas9 RNPs, after which  
365 GFP- or RFP-positive cells were measured by flow cytometry to estimate the HDR-based  
366 recoding efficiency at each site of interest.

367

368 Collectively at all the loci tested, cssDNA resulted in a significantly higher frequency of  
369 functional tag integration compared to the linear T-lssDNA (Figure 2B-E; significance  
370 values computed in Supplementary Table S4). Interestingly, although GFP and iTagRFP



371 and dTomato fusion tags have coding sequences of similar length, we observed higher  
372 integration efficiency with GFP cssDNA donor at the *ACTB* and *TOMM20* locus,  
373 especially in HEK293T cells, indicating that donor cassette composition may modestly  
374 influence integration efficiency in a cell type- and locus-specific manner. Similarly, at the  
375 *SEC61B* locus, cssDNA mediated integration of the dTomato tag was higher than what  
376 was achieved with T-ssDNA in both K562 cells and HEK293T cells (Figure 2D). As  
377 expected, we did not observe significant differences in donor integration efficiencies  
378 between T-ssDNA and B-ssDNA donors, although variability in the efficacy was  
379 observed depending on the target site, donor composition and cell type (Supplementary  
380 Fig. S8). As with TLR-MCV1, we observed cell-type- and site-specific differences in  
381 editing efficiencies with different cssDNA donor orientations, but there was no consistent  
382 trend that defined a preferred combination of target site and donor template strand  
383 (Supplementary Fig. S9). Collectively, while we observe cell type-, locus- and donor DNA  
384 sequence- and orientation-dependent variability in DNA integration efficiencies, our  
385 results show the increased potency of cssDNA templates for tagging proteins at various  
386 endogenous genomic loci in comparison to lssDNA templates.

### 388 **Circular ssDNA can effectively drive biallelic tagging of endogenous** 389 **proteins**

391 Biallelic tagging of a target gene is often desirable for functional genomics studies, but this  
392 outcome is often hampered by low HDR efficiency. Since we observed high yields of  
393 integration with cssDNA, we tested the ability of cssDNA to support biallelic integration  
394 at various endogenous sites. To distinguish between monoallelic and biallelic integration,  
395 we electroporated equimolar amounts of cssDNA donors containing green and red  
396 fluorescent tags along with the appropriate SpyCas9 RNP into cells and measured  
397 fluorescence in these cells using flow cytometry. The majority of labeled cells expressed a  
398 single green or red fluorescent tag (Figure 3). Encouragingly, for *ACTB*, *TOMM20* and  
399 *SEC61B* loci, 17-26% of fluorescent cells were tagged with both green fluorescent and red  
400 fluorescent proteins, indicating biallelic integration of reporter tags at these sites  
401 (Supplementary Fig. S10). Negligible levels of biallelic integration were observed at the  
402 *GAPDH* locus, likely due to lower overall HDR efficiencies at this locus, which could  
403 reflect toxicity associated with tagging GAPDH, an essential housekeeping protein.

405 To further compare the efficiency of fluorescent tag integration at the genetic loci of  
406 interest using cssDNA and lssDNA, we set up a competition assay and tested different  
407 combinations of cssDNA and lssDNA donors for their abilities to insert reporter tags at  
408 the *ACTB* locus (Figure 3B). We observed robust biallelic tagging when cssDNA donors  
409 encoding GFP and iTAGRFP tags were cotransfected in both HEK293T cells (Figure 3B)  
410 and K562 cells (Supplementary Fig. S11). Interestingly, when cssDNA was combined  
411 with an equimolar quantity of lssDNA to perform the knock-ins, we observed 30-fold  
412 higher RFP signal over GFP signal when RFP-encoding cssDNA was co-introduced with  
413 GFP-encoding lssDNA. Conversely, the combination of GFP-encoding cssDNA with  
414 RFP-encoding lssDNA yielded 10-fold more GFP-positive than RFP-positive cells.  
415 Overall these results confirm that cssDNA is more efficient than lssDNA as an HDR  
416 donor in cultured human cells and is effective for generating biallelic insertions of  
417 extended coding sequence into the genome.



418

419

## 420 **Discussion**

421

422 For most cellular applications, non-viral methods for the delivery of a donor DNA  
423 template are employed to achieve targeted DNA insertion at a locus of interest, owing to  
424 the ease of template production. Most previous non-viral approaches have used  
425 oligonucleotides (ODNs), plasmids or linear dsDNAs as the donor DNA template.<sup>10, 32, 61-</sup>  
426 <sup>63</sup> More recently, long lssDNA templates have been demonstrated to provide advantages  
427 over dsDNA by both reducing toxicity to cells and increasing HDR efficiency of the DNA  
428 donor cassette.<sup>21, 22, 24</sup> Enzymatic methods adopted for generating long ssDNAs have  
429 permitted the knock-in of gene segments such as fluorescent reporter tags, which are  
430 more difficult to generate as chemically synthesized donors. However, cost-effective  
431 enzymatic synthesis of long ssDNA can be challenging. In this study we performed a  
432 side-by-side comparison of cssDNA produced from phagemids with lssDNA produced  
433 either using published protocols<sup>22</sup> or a biotin-streptavidin capture method that we  
434 utilized<sup>29, 64</sup> (Table 1). The biotin-affinity approach for making lssDNA permits the  
435 efficient synthesis of longer DNA templates and is not subject to the potential fidelity  
436 issues of RT-based approaches, as the lssDNA is generated entirely by high-fidelity DNA  
437 polymerases. Overall, we found that phagemid-derived cssDNA, when co-delivered with  
438 Cas9 or Cas12a RNPs, is highly effective in achieving targeted integration of DNA  
439 cassettes in mammalian cells. The production of cssDNA templates using phagemids is  
440 time- and cost-effective in comparison to methods for generating lssDNA donors, in part  
441 because it requires fewer electrophoretic or affinity purification steps.

442

443 We examined the relative efficacy of HDR potentiated by different ssDNA donor  
444 compositions in the context of different Cas nuclease effectors, relative strand orientations  
445 and donor doses. We initially assessed the effects of these parameters and the donor  
446 compositions on HDR efficiencies using a modified traffic light reporter system (TLR-  
447 MCV1). This fluorescence-based system permits simultaneous evaluation of imprecise  
448 and HDR-based editing efficiencies with a range of Cas9 and Cas12a effectors. While we  
449 observed robust integration of the GFP correction cassette using SpyCas9, Cas12a  
450 nucleases achieved higher overall yields of donor integration. The effects of ssDNA strand  
451 orientation, whether lssDNA or cssDNA, exhibited cell-line- and target-site-specific  
452 variability. Overall, the potency of cssDNA donors was significantly higher (i.e., effective  
453 at lower doses) than lssDNA donors, with the TLR-MCV1 reporter as well as at  
454 endogenous sites. When used in conjunction with SpyCas9 RNP, cssDNA-based HDR  
455 was robust even at concentrations as low as 1pmol cssDNA donor per 100,000 cells, while  
456 lssDNA donors were 2- to 10-fold less effective at this dose. The use of large amounts of  
457 donor DNA to drive longer insertions in cell lines typically poses toxicity issues. The  
458 improved HDR potencies of cssDNA donors relative to those of the corresponding  
459 lssDNAs could arise from higher stability of these templates in cells, since the circular  
460 topology likely confers some resistance to exonucleases. Consistent with this hypothesis,  
461 post-synthetic circularization of a lssDNA template increased the HDR efficiency by  
462 about two-fold in K562 cells to levels that were comparable to phagemid-sourced  
463 cssDNA.

464

465 In addition to exonuclease resistance conferred by circular topology, phagemid-derived  
466 ssDNA templates offer several other advantages over lssDNA templates generated using  
467 RT- or PCR-based approaches: 1) cssDNA can be generated with longer donor  
468 cassettes.<sup>65</sup> Excluding the encoded bacterial and phage DNA sequences (~2,200 bp), our  
469 experience indicates that DNA cassettes up to ~10 kb (Supplementary Fig. S12) can be  
470 readily incorporated into the phagemid vector for successful ssDNA generation, without  
471 any concomitant increase in generation cost or production of truncated products. While  
472 linear ssDNA has the advantage of only containing the sequence of interest, creating  
473 donors of this length would be extremely challenging with TGIRT and potentially  
474 cumbersome even for PCR-based approaches. 2) TGIRT does not possess proofreading  
475 activity, and therefore the fidelity of ssDNA products that it produces is of concern,  
476 especially for longer donors. By contrast, the biotin-streptavidin affinity purification-based  
477 approach for generation of lssDNA and phagemid-derived cssDNA described in this  
478 paper can be used to generate accurate and full-length ssDNA. 3) The cost of generating  
479 full-length cssDNA molecules is modest compared to lssDNA generation by RT-based  
480 methods or the biotin-streptavidin affinity purification approach, which use expensive  
481 enzymes and DNA purification kits (Table 1). Moreover, the production of cssDNA can  
482 be readily scaled up to generate several micrograms of DNA at a relatively low cost,  
483 which would be cumbersome to accomplish using *in vitro* approaches. Overall, the efficacy  
484 of phagemid-derived cssDNAs as HDR templates, combined with their ease and  
485 economy of production, make them an attractive alternative for precise genome editing.  
486 cssDNA templates should prove advantageous for the efficient insertion of long DNA  
487 cassettes in a variety of different cell types and can be leveraged for basic science and  
488 potentially stem cell-based therapeutic applications.

489  
490

## 491 **Methods**

492

### 493 **Plasmids**

494

494 All the plasmids generated in this study were made using standard molecular biology  
495 techniques. A list of primers used to make the donor DNA templates are listed in  
496 Supplementary Table S4. A list of plasmids created is provided in Supplementary Table  
497 S5, and plasmids have been deposited in Addgene for distribution (Deposit #75933,  
498 75862, 87448, and 107317).

499

### 500 **Generation of ssDNA templates using phagemids:**

501

#### 501 *Preparation of cells*

502

502 1 ml of 2xYT media with 100µg/ml ampicillin was inoculated with a colony of XL1-Blue  
503 cells transformed with the phagemid of interest. After culturing cells at 37°C for ~8 hours  
504 or until the media became slightly cloudy (OD<sub>600</sub> ~0.1), 50 µl of VCSM13 phage (10<sup>10-11</sup>  
505 pfu/ml) was added to the bacterial culture and incubated without shaking at RT for 20  
506 minutes. Cells were then transferred to 250 ml 2xYT media with 100 µg/ml ampicillin  
507 and cultured at 37°C for 1-2 hours. To select for cells that had been infected by the  
508 phage, kanamycin was added to the cells to a final concentration of 75 µg/ml and  
509 cultured overnight.

510

#### 511 *Phage pellet preparation*

512 Cells were pelleted from the media by centrifugation at 10,000g for 20 minutes. The  
513 supernatant containing phage was filtered through a vacuum filter (pore size 0.22  $\mu\text{m}$ ) to  
514 eliminate cell debris and remove any remaining bacterial cells from the supernatant.  
515 DNase I (Sigma) was added to a final concentration of 10  $\mu\text{g}/\text{ml}$  and incubated at 37°C  
516 for 3 hours to eliminate any remaining dsDNA contamination in the supernatant. 10 g of  
517 PEG-8000 (Sigma) and 7.5 g of NaCl was added to 250 ml of supernatant and incubated  
518 at 4°C on ice for 1 to 2 hours to precipitate the phage. The supernatant was spun at  
519 12,000g for 30 minutes at 4°C and the supernatant was carefully poured out and the  
520 phage pellet was retained. Care was taken to remove as much PEG solution from the  
521 bottle as possible by wiping the inner surface using Kimwipes.

522

#### 523 *DNA extraction*

524 The ssDNA was extracted from the phage pellet using a modification of Purelink  
525 Midiprep columns from Life Technologies. The phage pellet was resuspended in 6 mls of  
526 1x TE buffer. 6 ml of 4% SDS was added to the phage suspension and incubated at 70°C  
527 for 30 minutes. 6 ml of Buffer N3 or 3 M Potassium acetate (pH 5.5) was then added to  
528 the solution and spun at 12,000g for 10 minutes at room temperature. During this time,  
529 the Purelink midiprep column was equilibrated by adding 10 ml of equilibration buffer.  
530 Following column equilibration, supernatant containing cssDNA was applied to the  
531 column. The column was washed twice with 10 ml of wash solution and eluted using 5 ml  
532 of elution buffer. 3.5 ml of isopropanol or 12.5 ml of 100% ethanol was added to  
533 precipitate the DNA and incubated at -80°C for 2 hours. The solution was spun at  
534 12,000g for 30 minutes to pellet the DNA. The DNA pellet was then washed with 5 ml  
535 70% ethanol and allowed to air-dry. The ssDNA was then resuspended in 50-100 $\mu\text{l}$  of TE  
536 buffer and stored at -20°C. We typically obtain 100-200  $\mu\text{g}$  of cssDNA from a 250 ml  
537 culture.

538

#### 539 **Generation of ssDNA templates using TGIRT**

540 Single-stranded DNA donors were generated using reverse transcription of an RNA  
541 intermediate using TGIRT-III, as previously described.<sup>22</sup> Briefly, the donor sequence and  
542 its homology arms were cloned into a plasmid. Eight 50  $\mu\text{l}$  PCR reactions were set up for  
543 each donor to amplify the cloned donor using forward primers that contain a 5' overhang  
544 encoding the T7 promoter. The generated PCR products were pooled and purified using  
545 carboxylate-modified magnetic bead solution (GE Healthcare #65152105050250). The  
546 purified DNA was used to generate the corresponding RNA by *in vitro* transcription using  
547 HiScribe T7 polymerase (NEB #E2040S). After purifying the RNA with carboxylate-  
548 modified magnetic beads, the reverse transcription reaction was generated using 400  
549 pmol of RNA, 800 pmol of reverse-transcription primer and 15  $\mu\text{l}$  of 25 mM dNTP mix.  
550 After annealing the primer at 65°C for 5 minutes, then on ice for 5 minutes, 3  $\mu\text{l}$  of  
551 TGIRT-III enzyme (InGex) was added and the reaction incubated at 58°C for 3 hours.  
552 The remaining RNA was hydrolyzed by base [0.5 M NaOH, 0.25 M EDTA (pH 8.0)]  
553 incubation at 95°C for 10 minutes. The NaOH was neutralized with an equal volume of  
554 0.5 M HCl. The generated ssDNA donor was purified by carboxylate-modified magnetic  
555 beads and eluted with 20  $\mu\text{l}$  or 15  $\mu\text{l}$  of RNase-free water containing 2 mM Tris-HCl (pH  
556 8.0).

557

558 **Generation of ssDNA templates using biotin and streptavidin-based affinity**  
559 **purification**

560 The PCR product template for producing ssDNA was generated using one unmodified and  
561 one 5'-biotinylated primer (purchased from IDT). The High-Fidelity PCR product was  
562 purified by PCR clean-up gel extraction (QIAquick Gel Extraction Kit). Streptavidin  
563 magnetic Dynabeads (NanoLink™, catalogue number M-1002; TriLink Biotechnologies,  
564 San Diego, CA, USA) were washed and resuspended in binding solution  
565 (KilobaseBINDER™, catalogue number 60101; Invitrogen, Life Technologies) as per the  
566 manufacturer's instructions and prepared for nucleic acid binding (17 µg of biotinylated  
567 dsDNA/mg Dynabeads, 0.8-3.3 kb). The prepared streptavidin-coated beads were  
568 incubated with biotinylated PCR product for 3 hours at room temperature or 4°C  
569 overnight while gently rotating the tubes to keep the beads in suspension. The supernatant  
570 was collected in an Eppendorf tube and biotinylated DNA-coated beads were separated  
571 with a magnet for 4 minutes. The beads were washed twice with buffer that consists of 50  
572 mM Tris-HCl (pH 8.0), 2 M NaCl and 0.05% Tween 20 by pipetting and using a volume  
573 equivalent to the solution used for nucleic acid binding, and then the tube was placed on  
574 the magnet for 2 min to collect the beads. The beads were then washed once with buffer  
575 containing 10 mM Tris-HCl (pH 8.0) and 50 mM NaCl. The bead-containing solution was  
576 then transferred to a fresh tube and the beads were separated from the solution using a  
577 magnet for 3 minutes.

578

579 **Denaturation of dsDNA**

580 Streptavidin beads bound to the biotinylated DNA were incubated with 155 µl of 0.1 N  
581 sodium hydroxide solution (NaOH) for 1 minute at room temperature to achieve alkaline  
582 denaturation of the biotinylated and non-biotinylated strands of the PCR  
583 product. Biotinylated ssDNA-coated beads were then separated with a magnet for 1  
584 minute. The supernatant was then transferred to a new 1.5 ml tube and the tube was placed  
585 back on the magnetic stand for an additional 1 minute. The solution containing the non-  
586 biotinylated strand was immediately neutralized by the addition of 1 M glacial acetic acid  
587 (15 µl of 1 M glacial acetic acid to neutralize 150 µl of 0.1 N NaOH), and an equal volume  
588 of 10 mM Tris-HCl (pH 7.5) solution was then added. The sample was applied on a Spin-  
589 X centrifuge tube filter (0.22 µm cellulose acetate) to remove any beads (~0.85 µm) and  
590 transferred to a fresh tube. The non-biotinylated strand was precipitated using ethanol  
591 precipitation and then re-dissolved in water.

592

593 **Circularization of linear ssDNA**

594 To circularize linear ssDNA donors generated by PCR using one 5'-phosphorylated and  
595 one 5'-biotinylated primer (IDT), the non-biotinylated and phosphorylated ssDNA was  
596 generated by the affinity purification method described above. Subsequently,  
597 phosphorylated ssDNA (e.g., ~20 pmol) was annealed with a 1.2-fold molar excess of splint  
598 oligonucleotide (24 pmol) that spans the two ends of the ssDNA in 1x *E. coli* DNA ligase  
599 buffer solution (NEB) to a final volume of 200 µl by heating the solution to 95°C for 2  
600 minutes and then cooling the reaction on ice for 2 minutes. After annealing, 40 units of *E.*  
601 *coli* DNA ligase (NEB) was added to the solution and incubated at 45°C for 1 hour to allow  
602 ligation of the ssDNA ends to proceed to completion. The solution was then treated with  
603 40 units of exonuclease I (NEB) and 40 units of exonuclease III (NEB) and incubated at

604 37°C for 30 min to eliminate linear ssDNA. Exonucleases were inactivated at 70°C for 20  
605 minutes. The cssDNA was cleaned by a NucleoSpin® (Macherey-Nagel GmbH & Co. KG,  
606 Düren, Germany) column, concentrated using ethanol precipitation, and then re-dissolved  
607 in water. DNA fractions were then run on a denaturing agarose gel (2%, 70V, 2hr) to  
608 examine the integrity and purity of the cssDNA.

609

### 610 **Cell culture**

611 HEK293T cells were maintained in DMEM media supplemented with 10% FBS and 1%  
612 penicillin and streptomycin (Gibco). K562 cells were maintained in RPMI 1650 media  
613 with 1 mM glutamine supplemented with 10% FBS and penicillin and streptomycin. All  
614 the cells were maintained in a humidified incubator at 37°C and 5% CO<sub>2</sub>.

615

### 616 **Electroporation of Cas9 or Cas12a RNPs**

617 All electroporations were done using the Neon transfection system (Invitrogen). 20 pmol  
618 of SpyCas9-3xNLS, AspCas12a, LbaCas12a, or FnoCas12a protein, along with 25 pmol  
619 of sgRNA (for SpyCas9) or 60 pmol of crRNA (for Cas12a), was added per reaction.  
620 Guide RNA was either generated using *in vitro* transcription (TLR-MCV1 locus) or was  
621 purchased from Synthego (for SpyCas9 sgRNAs targeting endogenous loci). RNP and  
622 guide RNA was precomplexed in buffer R for 10-20 minutes at room temperature and  
623 the solution was made up to a final volume of 12 µl. For electroporating K562 cells,  
624 150,000-200,000 cells per reaction were used. Cells for a reaction were spun down and  
625 the media was carefully removed. Cells were resuspended in 10 µl of buffer R containing  
626 the desired nuclease and nucleofected with 3 pulses of 1600V for 10 ms using a 10 µl  
627 Neon Tip. Cells were then plated in 24-well plates into 500 µl of RPMI 1650 media  
628 supplemented with 10% FBS and cultured in a humidified incubator at 37°C and 5%  
629 CO<sub>2</sub> for 3-4 days for TLR experiments, and for 2 weeks for experiments with donors to  
630 knock in fluorescence tags at endogenous sites, before analysis of samples using flow  
631 cytometry. For all HDR experiments except those in Figure 1E, 1 pmol of cssDNA, linear  
632 ssDNA or plasmid donor DNA was used. Donor DNA was added to the cells resuspended  
633 in buffer R or buffer R containing Cas9/Cas12a RNP.

634

635 For experiments with HEK293T cells, roughly 100,000 cells per reaction were used and  
636 the cells were given 2 pulses of 1100 V for 20 ms. For experiments shown in Figure 1C  
637 and 1D, 3 pmols of cssDNA, lssDNA or plasmid donor DNA were used. For the rest of  
638 the experiments except those in Figure 1E, 1 pmol of donor DNA was used for HDR  
639 experiments.

640

### 641 **FACS analysis**

642 Cells were first washed twice with 1x PBS before analysis using flow cytometry. All flow  
643 cytometry was performed on MACSQuant VYB by Miltenyi. For detection of mCherry  
644 signal, a yellow laser (wavelength 561nm) was used for excitation and a 615/20 nm  
645 emission filter was used. To detect GFP signal, a blue laser (excitation wavelength 488 nm  
646 and emission filter 525/50 nm) was used. 20,000 events were recorded for each sample  
647 and data was analyzed using Flowjo V.9.0 software. Cells were first gated on FSC-A and  
648 SSC-A plot to remove cell debris. This population was further plotted on an FSC-A vs  
649 FSC-H plot to circumscribe the single cell population. Finally, a bivariate plot between



650 FITC-A and txRED signal was used to estimate the percentage of GFP-positive or  
651 mCherry-positive population and was reported in this study as a measure of gene editing  
652 or homologous recombination as applicable.

653

### 654 **TIDE analysis**

655 Genomic DNA was extracted from mammalian cells using Sigma Genelute kit or Qiagen  
656 DNeasy Blood & Tissue Kits. PCR reactions were performed using genomic DNA as  
657 template with primers listed in Supplementary Table S4 as per the manufacturer's  
658 directions. Subsequently, PCR product was purified using the Zymo DNA purification kit  
659 and sent for analysis by Sanger sequencing along with primers listed in Supplementary  
660 Table S4. The chromatograms were analyzed with the TIDE analysis webtool<sup>55</sup>  
661 (<https://tide.nki.nl/>).

662

### 663 **Cas9 and Cas12a purification**

664 Protein purification for 3xNLS-SpyCas9 and Cas12a-2xNLS proteins followed a common  
665 protocol as previously described.<sup>66</sup> The generation and characterization of the 3xNLS-  
666 SpyCas9 and LbaCas12a-2xNLS constructs have been recently described.<sup>52, 67, 68</sup> The  
667 pET21a plasmid backbone (Novagen) was used to drive the expression of a hexa-His-  
668 tagged version of each protein. The plasmid expressing 3xNLS-SpyCas9 (or each Cas12a-  
669 2xNLS) was transformed into *E. coli* Rosetta (DE3) pLysS cells (EMD Millipore) for protein  
670 production. Cells were grown at 37°C to an OD600 of ~0.2, then shifted to 18°C and  
671 induced at an OD600 of ~0.4 for 16 hours with IPTG (1 mM final concentration).  
672 Following induction, cells were pelleted by centrifugation and then resuspended with Ni<sup>2+</sup>-  
673 NTA buffer [20 mM Tris-HCl (pH 7.5) + 1 M NaCl + 20 mM imidazole + 1 mM TCEP]  
674 supplemented with HALT Protease Inhibitor Cocktail, EDTA-Free (100x)  
675 [ThermoFisher] and lysed with a M-110s Microfluidizer (Microfluidics) following the  
676 manufacturer's instructions. The protein was purified from the cell lysate using Ni<sup>2+</sup>-NTA  
677 resin, washed with five volumes of Ni<sup>2+</sup>-NTA buffer and then eluted with elution buffer [20  
678 mM Tris-HCl (pH 7.5), 500 mM NaCl, 500 mM imidazole, 10% glycerol]. The 3xNLS-  
679 SpyCas9 (or each Cas12a) protein was dialyzed overnight at 4°C in 20 mM HEPES-NaOH  
680 (pH 7.5), 500 mM NaCl, 1 mM EDTA, and 10% glycerol. Subsequently, the protein was  
681 step-dialyzed from 500 mM NaCl to 200 mM NaCl [final dialysis buffer: 20 mM HEPES-  
682 NaOH (pH 7.5), 200 mM NaCl, 1 mM EDTA, 10% glycerol]. Next, the protein was  
683 purified by cation exchange chromatography [column = 5 ml HiTrap-S; Buffer A = 20  
684 mM HEPES-NaOH (pH 7.5) + 1 mM TCEP; Buffer B = 20 mM HEPES-NaOH (pH 7.5)  
685 + 1 M NaCl + 1 mM TCEP; flow rate = 5 ml/min; CV = column volume = 5 ml] followed  
686 by size-exclusion chromatography (SEC) on a Superdex-200 (16/60) column [isocratic size-  
687 exclusion running buffer = 20 mM HEPES-NaOH (pH 7.5), 150 mM NaCl, 1 mM TCEP  
688 for 3xNLS-SpyCas9; or 20 mM HEPES-NaOH (pH 7.5), 300 mM NaCl, 1 mM TCEP for  
689 each Cas12a-2xNLS]. The primary protein peak from the SEC was concentrated in an  
690 Ultra-15 Centrifugal Filters Ultracel-30K (Amicon) to a concentration around 100µM  
691 based on absorbance at 280nm. The purified protein quality was assessed by SDS-  
692 PAGE/Coomassie staining to be >95% pure and protein concentration was quantified  
693 with Pierce™ BCA Protein Assay Kit (ThermoFisher Scientific). Protein was stored at -  
694 80°C until further use.

695

### 696 ***In vitro* transcription**

697 The DNA cassette containing the U6 promoter and the sgRNA framework for SpyCas9  
698 was cloned from pLKO1-puro vector into pBluescript SK II+ backbone.<sup>67</sup> Plasmids  
699 expressing each guide RNA from the U6 promoter were constructed by annealing  
700 oligonucleotides encoding guide RNA and cloning it into BfuAI cleavage sites in this  
701 vector (Supplementary Table S2). Templates for *in vitro* transcription (IVT) of SpyCas9  
702 guides were amplified from the cognate plasmids using NEB Q5 High-Fidelity DNA  
703 Polymerase for 30 cycles (98°C, 15s; 65°C, 25s; 72°C, 20s) using primer sets designed to  
704 include the T7 scaffold (Supplementary Table S4). For crRNA generation for Cas12a  
705 orthologs, templates for *in vitro* transcription were generated by PCR amplification of  
706 oligonucleotides designed to include the T7 scaffold along with the guide RNA and a 15-  
707 mer overlap sequence to allow annealing between the oligos (Supplementary Table S4).  
708 The oligonucleotides encoded the full-length direct repeat crRNA sequence.<sup>67</sup> Thirty  
709 cycles of amplification were conducted using NEB Q5 High-Fidelity DNA polymerase  
710 (98°C, 15s; 60°C, 25s; 72°C, 20s). The PCR products were purified using the Zymo DNA  
711 Clean & Concentrator Kit (Zymo Cat. #D4005). IVT reactions were performed using  
712 the HiScribe T7 High Yield RNA Synthesis Kit using 300 ng of PCR product as template  
713 (NEB Cat. #E2040S). After an incubation for 16 hours at 37°C, samples were treated  
714 with DNase I for 40 mins at 37°C to remove any DNA contamination. Each guide RNA  
715 was purified using the Zymo RNA Clean and Concentrator Kit. Final RNA  
716 concentration was measured using a Nanodrop instrument and stored at -80°C until  
717 further use.

718

### 719 **Statistical Analysis**

720 R, a system for statistical computation and graphics, was used for the analysis.<sup>69</sup>  
721 Percentage of knock-in was first arcsin-transformed to homogenize the variance. Levene's  
722 test indicates that the assumption of homogeneity of variances was met. For Figure 2B  
723 and Supplementary Fig. S8, three-way analysis of variance (ANOVA) with Completely  
724 Randomized Design was performed to test whether there were main effects of DNA  
725 topology, target gene and fluorescent tag and whether there was a gene- or/and  
726 fluorescent tag-dependent topology effect. When no significant gene- or fluorescent tag-  
727 dependent topology effect was found, the main effect of DNA topology was reported.  
728 Otherwise, two levels of topology were compared within each combination of genetic loci  
729 and fluorescent tag under the ANOVA framework using the lsmeans package<sup>70</sup> if there  
730 was a significant difference among different treatments (F-test  $p < 0.01$ ). For Figure 1D,  
731 the three primary factors considered were DNA topology, Cas type and orientation. For  
732 the other figures, two-way analysis of variance (ANOVA) with Completely Randomized  
733 Design was performed to test whether there was an overall difference among different  
734 treatment groups. When the F-test was significant ( $p < 0.01$ ), predefined contrasts were  
735 performed within the ANOVA framework using the lsmeans package. P values were  
736 adjusted using the Hochberg method to correct for multiple inferences.<sup>71</sup>

737

### 738 **Author Contributions**

739

740 E.J.S., P.D.Z. and S.A.W. directed the study. S.I., A.M., E.J.S. and S.A.W. conceived the  
741 study. S.I., A.M., J.V.B., B.P.R., R.I., J.L., P.L., E.M. and J.S.B. performed experiments.  
742 L.J.Z. performed statistical analysis of data. S.I., A.M., E.J.S. and S.A.W. analyzed data.  
743 S.I., A.M., E.J.S. and S.A.W. wrote the manuscript with contributions from all authors.

744

## 745 **Acknowledgements**

746 All new reagents described in this work are being deposited with the nonprofit plasmid-  
747 distribution service Addgene. This work was supported by US National Institutes of  
748 Health grants (1R01GM115911, Somatic Cell Genome Editing grant UG3TR002668,  
749 and 4D Nucleome grant U54DK107980) to E.J.S. and S.A.W.

750

## 751 **References**

752

- 753 1. Sternberg SH, Doudna JA. Expanding the Biologist's Toolkit with CRISPR-  
754 Cas9. *Mol Cell*. 2015;58:568-574. DOI: 10.1016/j.molcel.2015.02.032
- 755 2. Wang H, La Russa M, Qi LS. CRISPR/Cas9 in Genome Editing and Beyond.  
756 *Annu Rev Biochem*. 2016;85:227-264. DOI: 10.1146/annurev-biochem-060815-  
757 014607
- 758 3. Kim D, Luk K, Wolfe SA et al. Evaluating and Enhancing Target Specificity of  
759 Gene-Editing Nucleases and Deaminases. *Annu Rev Biochem*. 2019;88:191-220. DOI:  
760 10.1146/annurev-biochem-013118-111730
- 761 4. Wu WY, Lebbink JHG, Kanaar R et al. Genome editing by natural and  
762 engineered CRISPR-associated nucleases. *Nat Chem Biol*. 2018;14:642-651. DOI:  
763 10.1038/s41589-018-0080-x
- 764 5. Murugan K, Babu K, Sundaresan R et al. The Revolution Continues: Newly  
765 Discovered Systems Expand the CRISPR-Cas Toolkit. *Mol Cell*. 2017;68:15-25. DOI:  
766 10.1016/j.molcel.2017.09.007
- 767 6. Vriend LE, Krawczyk PM. Nick-initiated homologous recombination:  
768 Protecting the genome, one strand at a time. *DNA Repair (Amst)*. 2017;50:1-13. DOI:  
769 10.1016/j.dnarep.2016.12.005
- 770 7. Porteus MH, Baltimore D. Chimeric nucleases stimulate gene targeting in  
771 human cells. *Science*. 2003;300:763. DOI: 10.1126/science.1078395
- 772 8. Rothkamm K, Kruger I, Thompson LH et al. Pathways of DNA double-strand  
773 break repair during the mammalian cell cycle. *Mol Cell Biol*. 2003;23:5706-5715.  
774 DOI: 10.1128/mcb.23.16.5706-5715.2003
- 775 9. Sander JD, Joung JK. CRISPR-Cas systems for editing, regulating and targeting  
776 genomes. *Nat Biotechnol*. 2014;32:347-355. DOI: 10.1038/nbt.2842
- 777 10. Roberts B, Haupt A, Tucker A et al. Systematic gene tagging using  
778 CRISPR/Cas9 in human stem cells to illuminate cell organization. *Mol Biol Cell*.  
779 2017;28:2854-2874. DOI: 10.1091/mbc.E17-03-0209
- 780 11. Yin H, Xue W, Chen S et al. Genome editing with Cas9 in adult mice corrects a  
781 disease mutation and phenotype. *Nat Biotechnol*. 2014;32:551-553. DOI:  
782 10.1038/nbt.2884
- 783 12. Dever DP, Bak RO, Reinisch A et al. CRISPR/Cas9 beta-globin gene targeting  
784 in human haematopoietic stem cells. *Nature*. 2016;539:384-389. DOI:  
785 10.1038/nature20134
- 786 13. Schwank G, Koo BK, Sasselli V et al. Functional repair of CFTR by  
787 CRISPR/Cas9 in intestinal stem cell organoids of cystic fibrosis patients. *Cell Stem*  
788 *Cell*. 2013;13:653-658. DOI: 10.1016/j.stem.2013.11.002

- 789 14. Bak RO, Dever DP, Reinisch A et al. Multiplexed genetic engineering of human  
790 hematopoietic stem and progenitor cells using CRISPR/Cas9 and AAV6. *Elife*.  
791 2017;6. DOI: 10.7554/eLife.27873
- 792 15. Liang X, Potter J, Kumar S et al. Enhanced CRISPR/Cas9-mediated precise  
793 genome editing by improved design and delivery of gRNA, Cas9 nuclease, and donor  
794 DNA. *J Biotechnol*. 2017;241:136-146. DOI: 10.1016/j.jbiotec.2016.11.011
- 795 16. Gaj T, Staahl BT, Rodrigues GMC et al. Targeted gene knock-in by homology-  
796 directed genome editing using Cas9 ribonucleoprotein and AAV donor delivery.  
797 *Nucleic Acids Res*. 2017;45:e98. DOI: 10.1093/nar/gkx154
- 798 17. Wang Y, Wang Y, Chang T et al. Integration-defective lentiviral vector  
799 mediates efficient gene editing through homology-directed repair in human  
800 embryonic stem cells. *Nucleic Acids Res*. 2017;45:e29. DOI: 10.1093/nar/gkw1057
- 801 18. Richardson CD, Ray GJ, DeWitt MA et al. Enhancing homology-directed  
802 genome editing by catalytically active and inactive CRISPR-Cas9 using asymmetric  
803 donor DNA. *Nat Biotechnol*. 2016;34:339-344. DOI: 10.1038/nbt.3481
- 804 19. Kan Y, Ruis B, Takasugi T et al. Mechanisms of precise genome editing using  
805 oligonucleotide donors. *Genome Res*. 2017;27:1099-1111. DOI:  
806 10.1101/gr.214775.116
- 807 20. Chen F, Pruett-Miller SM, Huang Y et al. High-frequency genome editing using  
808 ssDNA oligonucleotides with zinc-finger nucleases. *Nat Methods*. 2011;8:753-755.  
809 DOI: 10.1038/nmeth.1653
- 810 21. Quadros RM, Miura H, Harms DW et al. Easi-CRISPR: a robust method for  
811 one-step generation of mice carrying conditional and insertion alleles using long  
812 ssDNA donors and CRISPR ribonucleoproteins. *Genome Biol*. 2017;18:92. DOI:  
813 10.1186/s13059-017-1220-4
- 814 22. Li H, Beckman KA, Pessino V et al. Design and specificity of long ssDNA  
815 donors for CRISPR-based knock-in. *bioRxiv*. 2017:178905. DOI: 10.1101/178905
- 816 23. Yoshimi K, Kunihiro Y, Kaneko T et al. ssODN-mediated knock-in with  
817 CRISPR-Cas for large genomic regions in zygotes. *Nat Commun*. 2016;7:10431. DOI:  
818 10.1038/ncomms10431
- 819 24. Miura H, Quadros RM, Gurumurthy CB et al. Easi-CRISPR for creating knock-  
820 in and conditional knockout mouse models using long ssDNA donors. *Nat Protoc*.  
821 2018;13:195-215. DOI: 10.1038/nprot.2017.153
- 822 25. Kunkel TA. Rapid and efficient site-specific mutagenesis without phenotypic  
823 selection. *Proc Natl Acad Sci U S A*. 1985;82:488-492.
- 824 26. Lin C, Rinker S, Wang X et al. In vivo cloning of artificial DNA nanostructures.  
825 *Proc Natl Acad Sci U S A*. 2008;105:17626-17631. DOI: 10.1073/pnas.0805416105
- 826 27. Smith GP. Filamentous fusion phage: novel expression vectors that display  
827 cloned antigens on the virion surface. *Science*. 1985;228:1315-1317.
- 828 28. Iyer S, Doktycz MJ. Thrombin-mediated transcriptional regulation using DNA  
829 aptamers in DNA-based cell-free protein synthesis. *ACS Synth Biol*. 2014;3:340-346.  
830 DOI: 10.1021/sb4000756
- 831 29. Mitchell LG, Merrill CR. Affinity generation of single-stranded DNA for  
832 dideoxy sequencing following the polymerase chain reaction. *Anal Biochem*.  
833 1989;178:239-242. DOI: 10.1016/0003-2697(89)90631-3



- 834 30. Qi H, Lu H, Qiu HJ et al. Phagemid vectors for phage display: properties,  
835 characteristics and construction. *J Mol Biol.* 2012;417:129-143. DOI:  
836 10.1016/j.jmb.2012.01.038
- 837 31. Zhou B, Dong Q, Ma R et al. Rapid isolation of highly pure single-stranded  
838 DNA from phagemids. *Anal Biochem.* 2009;389:177-179. DOI:  
839 10.1016/j.ab.2009.03.044
- 840 32. Roth TL, Puig-Saus C, Yu R et al. Reprogramming human T cell function and  
841 specificity with non-viral genome targeting. *Nature.* 2018;559:405-409. DOI:  
842 10.1038/s41586-018-0326-5
- 843 33. Miura H, Gurumurthy CB, Sato T et al. CRISPR/Cas9-based generation of  
844 knockdown mice by intronic insertion of artificial microRNA using longer single-  
845 stranded DNA. *Sci Rep.* 2015;5:12799. DOI: 10.1038/srep12799
- 846 34. Leonetti MD, Sekine S, Kamiyama D et al. A scalable strategy for high-  
847 throughput GFP tagging of endogenous human proteins. *Proc Natl Acad Sci U S A.*  
848 2016;113:E3501-3508. DOI: 10.1073/pnas.1606731113
- 849 35. Xiong Y, Eickbush TH. Origin and evolution of retroelements based upon  
850 their reverse transcriptase sequences. *EMBO J.* 1990;9:3353-3362.
- 851 36. Harrison GP, Mayo MS, Hunter E et al. Pausing of reverse transcriptase on  
852 retroviral RNA templates is influenced by secondary structures both 5' and 3' of the  
853 catalytic site. *Nucleic Acids Res.* 1998;26:3433-3442. DOI: 10.1093/nar/26.14.3433
- 854 37. Certo MT, Ryu BY, Annis JE et al. Tracking genome engineering outcome at  
855 individual DNA breakpoints. *Nat Methods.* 2011;8:671-676. DOI:  
856 10.1038/nmeth.1648
- 857 38. Cong L, Ran FA, Cox D et al. Multiplex genome engineering using CRISPR/Cas  
858 systems. *Science.* 2013;339:819-823. DOI: 10.1126/science.1231143
- 859 39. Jinek M, Chylinski K, Fonfara I et al. A programmable dual-RNA-guided DNA  
860 endonuclease in adaptive bacterial immunity. *Science.* 2012;337:816-821. DOI:  
861 10.1126/science.1225829
- 862 40. Hou Z, Zhang Y, Propson NE et al. Efficient genome engineering in human  
863 pluripotent stem cells using Cas9 from *Neisseria meningitidis*. *Proc Natl Acad Sci U S*  
864 *A.* 2013;110:15644-15649. DOI: 10.1073/pnas.1313587110
- 865 41. Esvelt KM, Mali P, Braff JL et al. Orthogonal Cas9 proteins for RNA-guided  
866 gene regulation and editing. *Nat Methods.* 2013;10:1116-1121. DOI:  
867 10.1038/nmeth.2681
- 868 42. Edraki A, Mir A, Ibraheim R et al. A Compact, High-Accuracy Cas9 with a  
869 Dinucleotide PAM for In Vivo Genome Editing. *Mol Cell.* 2019;73:714-726 e714. DOI:  
870 10.1016/j.molcel.2018.12.003
- 871 43. Fonfara I, Le Rhun A, Chylinski K et al. Phylogeny of Cas9 determines  
872 functional exchangeability of dual-RNA and Cas9 among orthologous type II CRISPR-  
873 Cas systems. *Nucleic Acids Res.* 2014;42:2577-2590. DOI: 10.1093/nar/gkt1074
- 874 44. Yamada M, Watanabe Y, Gootenberg JS et al. Crystal Structure of the Minimal  
875 Cas9 from *Campylobacter jejuni* Reveals the Molecular Diversity in the CRISPR-Cas9  
876 Systems. *Mol Cell.* 2017;65:1109-1121 e1103. DOI: 10.1016/j.molcel.2017.02.007
- 877 45. Kim E, Koo T, Park SW et al. In vivo genome editing with a small Cas9  
878 orthologue derived from *Campylobacter jejuni*. *Nat Commun.* 2017;8:14500. DOI:  
879 10.1038/ncomms14500



- 880 46. Ran FA, Cong L, Yan WX et al. In vivo genome editing using *Staphylococcus*  
881 *aureus* Cas9. *Nature*. 2015;520:186-191. DOI: 10.1038/nature14299
- 882 47. Harrington LB, Paez-Espino D, Staahl BT et al. A thermostable Cas9 with  
883 increased lifetime in human plasma. *Nat Commun*. 2017;8:1424. DOI:  
884 10.1038/s41467-017-01408-4
- 885 48. Zetsche B, Gootenberg JS, Abudayyeh OO et al. Cpf1 is a single RNA-guided  
886 endonuclease of a class 2 CRISPR-Cas system. *Cell*. 2015;163:759-771. DOI:  
887 10.1016/j.cell.2015.09.038
- 888 49. Zetsche B, Heidenreich M, Mohanraju P et al. Multiplex gene editing by  
889 CRISPR-Cpf1 using a single crRNA array. *Nat Biotechnol*. 2017;35:31-34. DOI:  
890 10.1038/nbt.3737
- 891 50. DeWitt MA, Magis W, Bray NL et al. Selection-free genome editing of the  
892 sickle mutation in human adult hematopoietic stem/progenitor cells. *Sci Transl Med*.  
893 2016;8:360ra134. DOI: 10.1126/scitranslmed.aaf9336
- 894 51. Liang X, Potter J, Kumar S et al. Rapid and highly efficient mammalian cell  
895 engineering via Cas9 protein transfection. *J Biotechnol*. 2015;208:44-53. DOI:  
896 10.1016/j.jbiotec.2015.04.024
- 897 52. Xu S, Luk K, Yao Q et al. Editing aberrant splice sites efficiently restores beta-  
898 globin expression in beta-thalassemia. *Blood*. 2019;133:2255-2262. DOI:  
899 10.1182/blood-2019-01-895094
- 900 53. Schumann K, Lin S, Boyer E et al. Generation of knock-in primary human T  
901 cells using Cas9 ribonucleoproteins. *Proc Natl Acad Sci U S A*. 2015;112:10437-  
902 10442. DOI: 10.1073/pnas.1512503112
- 903 54. Kim S, Kim D, Cho SW et al. Highly efficient RNA-guided genome editing in  
904 human cells via delivery of purified Cas9 ribonucleoproteins. *Genome Res*.  
905 2014;24:1012-1019. DOI: 10.1101/gr.171322.113
- 906 55. Brinkman EK, Chen T, Amendola M et al. Easy quantitative assessment of  
907 genome editing by sequence trace decomposition. *Nucleic Acids Res*. 2014;42:e168.  
908 DOI: 10.1093/nar/gku936
- 909 56. Hendel A, Bak RO, Clark JT et al. Chemically modified guide RNAs enhance  
910 CRISPR-Cas genome editing in human primary cells. *Nat Biotechnol*. 2015;33:985-  
911 989. DOI: 10.1038/nbt.3290
- 912 57. Wang Y, Liu KI, Sutrisnoh NB et al. Systematic evaluation of CRISPR-Cas  
913 systems reveals design principles for genome editing in human cells. *Genome Biol*.  
914 2018;19:62. DOI: 10.1186/s13059-018-1445-x
- 915 58. Yang L, Guell M, Byrne S et al. Optimization of scarless human stem cell  
916 genome editing. *Nucleic Acids Res*. 2013;41:9049-9061. DOI: 10.1093/nar/gkt555
- 917 59. Lin S, Staahl BT, Alla RK et al. Enhanced homology-directed human genome  
918 engineering by controlled timing of CRISPR/Cas9 delivery. *Elife*. 2014;3:e04766.  
919 DOI: 10.7554/eLife.04766
- 920 60. He X, Tan C, Wang F et al. Knock-in of large reporter genes in human cells via  
921 CRISPR/Cas9-induced homology-dependent and independent DNA repair. *Nucleic*  
922 *Acids Res*. 2016;44:e85. DOI: 10.1093/nar/gkw064
- 923 61. Song F, Stieger K. Optimizing the DNA Donor Template for Homology-  
924 Directed Repair of Double-Strand Breaks. *Mol Ther Nucleic Acids*. 2017;7:53-60. DOI:  
925 10.1016/j.omtn.2017.02.006

- 926 62. Zhang Y, Zhang Z, Ge W. An efficient platform for generating somatic point  
927 mutations with germline transmission in the zebrafish by CRISPR/Cas9-mediated  
928 gene editing. *J Biol Chem*. 2018;293:6611-6622. DOI: 10.1074/jbc.RA117.001080  
929 63. Hayashi A, Tanaka K. Short-Homology-Mediated CRISPR/Cas9-Based Method  
930 for Genome Editing in Fission Yeast. *G3 (Bethesda)*. 2019;9:1153-1163. DOI:  
931 10.1534/g3.118.200976  
932 64. Uhlen M. Magnetic separation of DNA. *Nature*. 1989;340:733-734. DOI:  
933 10.1038/340733a0  
934 65. Greenstein D, Brent R. Introduction to vectors derived from filamentous  
935 phages. *Curr Protoc Mol Biol*. 2001;Chapter 1:Unit1 14. DOI:  
936 10.1002/0471142727.mb0114s13  
937 66. Iyer S, Suresh S, Guo D et al. Precise therapeutic gene correction by a simple  
938 nuclease-induced double-stranded break. *Nature*. 2019;568:561-565. DOI:  
939 10.1038/s41586-019-1076-8  
940 67. Liu P, Luk K, Shin M et al. Enhanced Cas12a editing in mammalian cells and  
941 zebrafish. *Nucleic Acids Res*. 2019. DOI: 10.1093/nar/gkz184  
942 68. Wu Y, Zeng J, Roscoe BP et al. Highly efficient therapeutic gene editing of  
943 human hematopoietic stem cells. *Nat Med*. 2019;25:776-783. DOI: 10.1038/s41591-  
944 019-0401-y  
945 69. Ihaka R, Gentleman R. R: A Language for Data Analysis and Graphics. *Journal*  
946 *of Computational and Graphical Statistics*. 1996;5:299-314. DOI: 10.2307/1390807  
947 70. Lenth RV. Least-Squares Means: The R Package lsmeans. 2016. 2016 (least-  
948 squares means; linear models; experimental design);69:33. DOI:  
949 10.18637/jss.v069.i01  
950 71. Huang Y, Hsu JC. Hochberg's Step-up Method: Cutting Corners off Holm's  
951 Step-down Method. *Biometrika*. 2007;94:965-975.  
952  
953

954 **Figure Legends**

955

956 **Fig. 1.** Comparisons of the activity of different DNA donors in homology-directed repair  
957 using the Traffic Light Reporter Multi-Cas Variant 1 (TLR-MCV1) cassette in human  
958 cells. **(A)** The schematic depicts the TLR-MCV1 system showing the SFFV promoter  
959 driving the expression of GFP and mCherry, separated by a ribosome-skipping T2A  
960 signal. The yellow arrow depicts the SFFV promoter driving the expression of the GFP-  
961 T2A-mCherry cassette. The orange line indicates the insertion containing target  
962 sequences for different Cas effectors, the sequence of which is shown below the schematic  
963 of TLR-MCV1. Sequences and arrows in blue indicate overlapping PAMs and a  
964 common cut site associated with SpyCas9, Nme1Cas9, CjeCas9 and SauCas9. The  
965 bolded black sequence and black arrow depict the Nme2Cas9 PAM and cut site  
966 respectively. Magenta text shows PAMs associated with Cas12a effectors, and their  
967 approximate cut sites are shown by magenta lines. The PAMs associated with Geo1Cas9  
968 and Geo2Cas9 are highlighted in green and tan text, respectively. The cut sites for these  
969 two Cas9s are shown by green and tan arrows, respectively. DSBs at any of the sites of  
970 these may be imprecisely repaired via the NHEJ pathway resulting in mCherry  
971 expression (shown on the left) if repair results in (+1 frameshift) productive translation. In  
972 the presence of donor, HDR-mediated correction of “broken” GFP region results in  
973 restoration of GFP expression (shown on the right). **(B)** Efficacy of distinct DNA  
974 templates in driving HDR. The graph depicts the percentage of mCherry- and GFP-  
975 positive cells obtained after co-delivery of SpyCas9 or AspCas12a RNP with cssDNA, T-  
976 lssDNA, B-lssDNA or plasmid DNA repair templates into TLR-MCV1 K562 cells (upper  
977 grey box) and TLR-MCV1 HEK293T cells (lower blue box). Numbers above the bars  
978 indicate ratios of GFP-positive (shown in cyan) to total indel events [mCherry-positive  
979 (shown in red) + GFP-positive cells]. Bars represent the mean from three independent  
980 biological replicates and error bars represent the standard error of the mean (s.e.m.). **(C)**  
981 Comparison of cssDNA- and T-lssDNA-mediated HDR efficiency upon treatment of  
982 TLR-MCV1 cells with distinct Cas effectors. The graph depicts the percentage of  
983 mCherry- and GFP-positive cells obtained after co-delivery of SpyCas9, AspCas12a,  
984 LbaCas12a or FnoCas12a with cssDNA and T-lssDNA DNA repair templates into TLR-  
985 MCV1 K562 cells (upper grey box) and TLR-MCV1 HEK293T cells (lower blue box).  
986 Numbers above the bars indicate ratios of GFP-positive (shown in cyan) to total indel  
987 events (mCherry-positive + GFP-positive). Bars represent the mean from three  
988 independent biological replicates and error bars represent the standard error of mean  
989 (s.e.m.). **(D)** Effect of cssDNA and T-lssDNA donor orientation on HDR efficiency. The  
990 graph depicts the percentage of mCherry- and GFP-positive cells obtained after co-  
991 delivery of SpyCas9-1 or AspCas12a (targeting the same strand) with sense (S) and  
992 antisense (AS) strand cssDNA and T-lssDNA DNA repair templates into TLR-MCV1  
993 K562 cells (upper grey box) and TLR-MCV1 HEK293T cells (lower blue box). Numbers  
994 above the bars indicate ratios of GFP-positive (shown in cyan) to total indel events  
995 (mCherry-positive + GFP-positive). Bars represent the mean from three independent  
996 biological replicates and error bars represent s.e.m. **(E)** Dose dependence of cssDNA and  
997 T-lssDNA donor template-mediated HDR efficiency. The graph shows the percentage of  
998 GFP-positive cells as a function of increasing cssDNA and T-lssDNA donor DNA in the  
999 presence of SpyCas9 and AspCas12a proteins in TLR-MCV1 K562 cells (left) and

1000 HEK293T cells (right). Bars represent the mean from three independent biological  
1001 replicates and error bars represent s.e.m.

1002

1003 **Fig. 2.** Comparisons of DNA donors in homology-directed repair of endogenous  
1004 genomic loci in human cells. **(A)** Schematic of fluorescent protein tagging. The left panel  
1005 shows a schematic of a genomic region containing the SpyCas9 target site and also  
1006 depicts the design of a donor template containing the fluorescent protein of interest  
1007 flanked by homology arms (HA). The right panel shows a schematic of each target  
1008 genomic locus and the arrangement of the fluorescent tag (EGFP, dTomato or iTagRFP-  
1009 T) following integration. In cases of donors delivered to fluorescently tag the *GAPDH*  
1010 locus, the fluorescent tag is preceded by an IRES (internal ribosome entry site) and  
1011 followed by a bovine growth hormone (bGH) polyadenylation sequence. **(B-E)** Bar  
1012 graphs displaying the percentages of fluorescent cells obtained upon co-delivery of 20  
1013 pmoles of SpyCas9 complexed with 25 pmoles of guide RNA targeting the **(B)** *ACTB*,  
1014 **(C)** *TOMM20*, **(D)** *SEC61B*, or **(E)** *GAPDH* locus with or without cssDNA or T-*lssDNA*  
1015 as a donor template. Bars represent the mean from three independent biological  
1016 replicates and error bars represent s.e.m.

1017

1018 **Fig. 3.** Biallelic tagging of endogenous proteins using two different cssDNA donor  
1019 templates. **(A)** The graph shows the percentage of fluorescent cells tagged with GFP  
1020 (shown in cyan), dTomato (shown in red) or both (shown in yellow) at each locus  
1021 (*TOMM20*, *SEC61B* or *GAPDH*) in K562 cells (top panel) and HEK293T cells (bottom  
1022 panel). 20 pmol SpyCas9 RNPs were co-delivered with 0.5 pmol of each cssDNA  
1023 templates. Bars represent the mean from three independent biological replicates and  
1024 error bars represent s.e.m. **(B)** Competition between cssDNA and *lssDNA* templates as  
1025 donors for HDR. The graph shows the percentage of cells tagged with GFP (shown in  
1026 cyan), iTAG-RFP (shown in red) or both GFP and iTAG-RFP (shown in yellow) at the  
1027 *ACTB* locus. Bars represent the mean from three independent biological replicates and  
1028 error bars represent s.e.m.

1029

1030

### 1031 **Legends for supplementary information**

1032

1033 **Supplementary Fig. S1.** Preparation of different ssDNA templates. **(A)** Donor DNA is  
1034 cloned into phagemid vectors containing an *f1* bacteriophage origin of replication and an  
1035 antibiotic resistance marker. The plasmid is transformed into *E. coli* cells and  
1036 superinfected with a helper phage. Depending on the orientation of the *f1* origin, one  
1037 particular strand is packaged into phage particles and extruded into the media from  
1038 which phage particles are precipitated and cssDNA is purified. **(B)** PCR product  
1039 encoding donor DNA is generated using a 5' primer containing a T7 promoter within the  
1040 tail. The product is then used as a template for *in vitro* transcription to generate RNA.  
1041 This RNA in turn is used as a template for reverse transcription using a reverse  
1042 transcriptase such as TGIRT to generate linear ssDNA (T-*lssDNA*). **(C)** A PCR primer is  
1043 biotinylated at the 5' end. The resulting biotinylated PCR product is then immobilized on  
1044 streptavidin magnetic beads. The immobilized PCR product is then subjected to alkaline  
1045 denaturation to separate the biotinylated strand from the non-biotinylated strand. The  
1046 eluted non-biotinylated DNA strand is then recovered for use as an *lssDNA* (B-*lssDNA*).

1047 **(D)** S1 nuclease digestion of DNA templates. To determine whether the templates  
1048 generated are entirely single stranded, dsDNA products (Plasmid and PCR templates)  
1049 and ssDNA templates (cssDNA, T-*lssDNA* and B-*lssDNA*) were digested with S1 nuclease.  
1050 Undigested product (“Undig.”) was loaded alongside digested products (“Dig.”)  
1051

1052 **Supplementary Fig. S2.** Precise and imprecise editing efficiencies for plasmid-encoded  
1053 nucleases in the TLR-MCV1 reporter system. **(A)** Precise and imprecise editing efficacy  
1054 of different Cas9 and Cas12a nucleases: The graph depicts the percentage of mCherry-  
1055 positive (shown in red, representative of the indel efficiency) and GFP-positive (shown in  
1056 cyan, representative of the HDR efficiency) cells obtained after co-delivery of 250 ng  
1057 plasmid-encoded nucleases, 250 ng of gRNA plasmid and 500 ng of plasmid donor DNA  
1058 template into TLR-MCV1 HEK293T cells. Bars represent the mean from three  
1059 independent biological replicates and error bars represent s.e.m. **(B)** Dose dependence of  
1060 editing efficiency as a function of plasmid concentration: The graph depicts the  
1061 percentage of mCherry-positive cells as a function of increasing concentrations of  
1062 plasmids encoding various nuclease effectors while the amount of sgRNA-expressing  
1063 plasmid was held constant. Points represent the mean from three independent biological  
1064 replicates and error bars represent s.e.m.  
1065

1066 **Supplementary Fig. S3.** TIDE analysis to ascertain indel efficiencies at the TLR-  
1067 MCV1 locus in HEK293T cells. The graph shows indel percentages observed at the  
1068 TLR-MCV1 locus using SpyCas9, LbaCas12a, AspCas12a and FnoCas12a effectors  
1069 based on TIDE analysis of Sanger sequencing data of the locus following nuclease  
1070 treatment (in the absence of donor DNA). The green bar shows the percentage of  
1071 insertions and the pink bar shows the percentage of deletions. The data show the indel  
1072 percentages from three biological replicates.  
1073

1074 **Supplementary Fig. S4.** Effect of circularization of B-*lssDNA* on HDR efficiency. **(A)**  
1075 Schematic of the approach used to generate circularized B-*lssDNA*. A short  
1076 oligonucleotide (red) is hybridized to the B-*lssDNA* containing a 5'-phosphorylated end  
1077 such that the oligo spans the 5' and 3' ends of the linear ssDNA. The sample is treated  
1078 with *E. coli* DNA ligase to ligate the ends. The *lssDNA* sample is then treated with  
1079 Exonucleases (I and III) to eliminate residual uncircularized *lssDNA*. The agarose gel  
1080 shows unligated and ligated *lssDNA* before and after treatment with Exonucleases, which  
1081 digest unprotected, linear DNA species. **(B)** The graph depicts the percentage of  
1082 mCherry- and GFP-positive cells obtained after co-delivery of SpyCas9 with B-*lssDNA*  
1083 and circularized B-*lssDNA* DNA repair templates into TLR-MCV1 K562 cells (upper  
1084 grey box) and TLR-MCV1 HEK293T cells (lower blue box). Numbers above the bars  
1085 indicate ratios of GFP-positive (shown in cyan) to total indels [mCherry-positive (shown in  
1086 red) and GFP-positive cells]. Bars represent the mean from three independent biological  
1087 replicates and error bars represent s.e.m. Numbers in the boxes below the bars show  
1088 percentages of GFP-positive cells.  
1089

1090 **Supplementary Fig. S5.** The ratio of GFP-positive cells to total editing in the samples  
1091 shown in Figure 1C. The bar graph of the ratio of GFP-positive cells over total edited  
1092 cells (mCherry-positive + GFP-positive cells) obtained upon treatment of TLR-MCV1  
1093 K562 cells (upper panel) and TLR-MCV1 HEK293T cells (lower panel) with SpyCas9,



1094 AspCas12a, LbaCas12a, or FnoCas12a in the absence of donor DNA or the presence of  
1095 the indicated donor. Bars represent the mean from three independent biological  
1096 replicates and error bars represent s.e.m.

1097

1098 **Supplementary Fig. S6.** Strand dependence of guide and HDR template on knock-in  
1099 efficiency. **(A)** Schematic of guide (depicted by black and blue lines) and strand  
1100 orientation relative to the TLR-MCV1 target site. The magenta carrots indicate the  
1101 position of the SpyCas9 DSB. The green and red lines indicate GFP and mCherry  
1102 encoding regions, respectively. The orange region depicts the small insertion containing  
1103 target sites for Cas9 and Cas12a proteins. **(B)** The graph depicts the percentage of  
1104 mCherry- and GFP-positive cells obtained after co-delivery of SpyCas9 complexed with  
1105 guides (SpyCas9 RNP) targeting either strand of the TLR-MCV1 reporter along with  
1106 DNA repair templates complementary to the antisense or sense strand in K562 cells  
1107 (upper grey box) and HEK293T cells (lower blue box). Numbers above the bars indicate  
1108 ratios of GFP-positive (shown in cyan) to total indel events [mCherry-positive (shown in  
1109 red) cells and GFP-positive cells]. Bars represent the mean from three independent  
1110 biological replicates and error bars represent s.e.m.

1111

1112 **Supplementary Fig. S7.** SpyCas9 gene editing efficiency at the *ACTB*, *TOMM20*,  
1113 *SEC61B* and *GAPDH* loci. Genome editing was achieved by electroporation of 20 pmoles  
1114 SpyCas9 complexed with 25 pmoles of guide RNA into HEK293T cells in the absence of  
1115 HDR donor. The editing percentages were calculated by TIDE analysis (indicated above  
1116 the bars). Pink bars indicate the proportion of deletions and green bars indicate the  
1117 proportion of insertions within the indel population.

1118

1119 **Supplementary Fig. S8.** Efficiencies of fluorescent tag integration achieved with  
1120 lssDNA donors generated using the TGIRT-mediated RT-PCR (T-lssDNA) or biotin-  
1121 streptavidin affinity purification (B-lssDNA) approaches. Editing efficiencies for SpyCas9  
1122 RNPs and lssDNA donor delivery targeting the **(A)** *ACTB*, **(B)** *TOMM20*, **(C)** *SEC61B*,  
1123 and **(D)** *GAPDH* loci in K562 (top panel) and HEK293T (bottom panel) cells are shown.  
1124 Bars represent the mean from three independent biological replicates and error bars  
1125 represent s.e.m.

1126

1127 **Supplementary Fig. S9.** Effect of orientation of cssDNA on HDR efficiencies at  
1128 endogenous loci. Editing efficiencies for SpyCas9 RNPs and cssDNA donor delivery  
1129 targeting the **(A)** *ACTB*, **(B)** *TOMM20*, **(C)** *SEC61B* and **(D)** *GAPDH* loci in K562 cells  
1130 (top panel) and HEK293T cells (bottom panel) are shown. Green bars indicate  
1131 percentages of cells expressing GFP and red bars correspond to iTAG-RFP/dTomato  
1132 integration events. Solid bars correspond to donor DNA in orientation 1 (ssDNA  
1133 complementary to the antisense strand of the target gene) and hashed bars correspond to  
1134 orientation 2 (ssDNA complementary to the sense strand of the target gene). Bars  
1135 represent the mean from three independent biological replicates and error bars represent  
1136 s.e.m.

1137

1138 **Supplementary Fig. S10.** Confocal images showing tagging of GFP and iTAG-RFP at  
1139 the *ACTB* locus (top panel) and GFP and dTomato at the *TOMM20* (middle panel) or  
1140 *SEC61B* (bottom panel) loci in HEK293T cells from experiments shown in Figure 3.

1141

1142 **Supplementary Fig. S11.** Biallelic integration of GFP and iTagRFP in K562 cells  
1143 using cssDNA template. K562 cells were electroporated with 1 pmol each of GFP- and  
1144 iTagRFP-encoding cssDNA templates along with 20 pmols of SpyCas9 complexed with  
1145 25 pmols of guide RNA targeting *ACTB*. Green bars represent the percentage of GFP-  
1146 positive cells, red bars represent iTagRFP-expressing cells and yellow bars represents cells  
1147 expressing both GFP and iTagRFP. Bars represent the mean from three independent  
1148 biological replicates and error bars represent s.e.m.

1149

1150 **Supplementary Fig. S12.** 1% agarose gel image showing 1kb ladder (lane 1), as well as  
1151 cssDNA generated from plasmids that are 5.4kb (lane 2), 6.2kb (lane 3), 8.2kb (lane 4) and  
1152 13.6 kb (lane 5) in length.

**Table 1: Features of different ssDNA preparation methods**

| <b>Preparation method</b> | <b>Typical Yield/Prep</b> | <b>Cost/Prep</b> | <b>Time/Prep</b>                                  | <b>Maximum Length of ssDNA prepared</b> |
|---------------------------|---------------------------|------------------|---------------------------------------------------|-----------------------------------------|
| <b>cssDNA</b>             | 150-200 $\mu$ g           | \$14             | 24 hours for expression; 6 hours for purification | 13kb                                    |
| <b>T-ssDNA</b>            | 9 $\mu$ g                 | \$65             | 11 hours for purification                         | 3.5kb                                   |
| <b>B-ssDNA</b>            | 12 $\mu$ g                | \$109            | 9 hours for purification                          | 3.3kb                                   |

cssDNA – circular ssDNA

T-ssDNA - reverse-transcription generated linear ssDNA

B-ssDNA - biotin-based affinity purified linear ssDNA

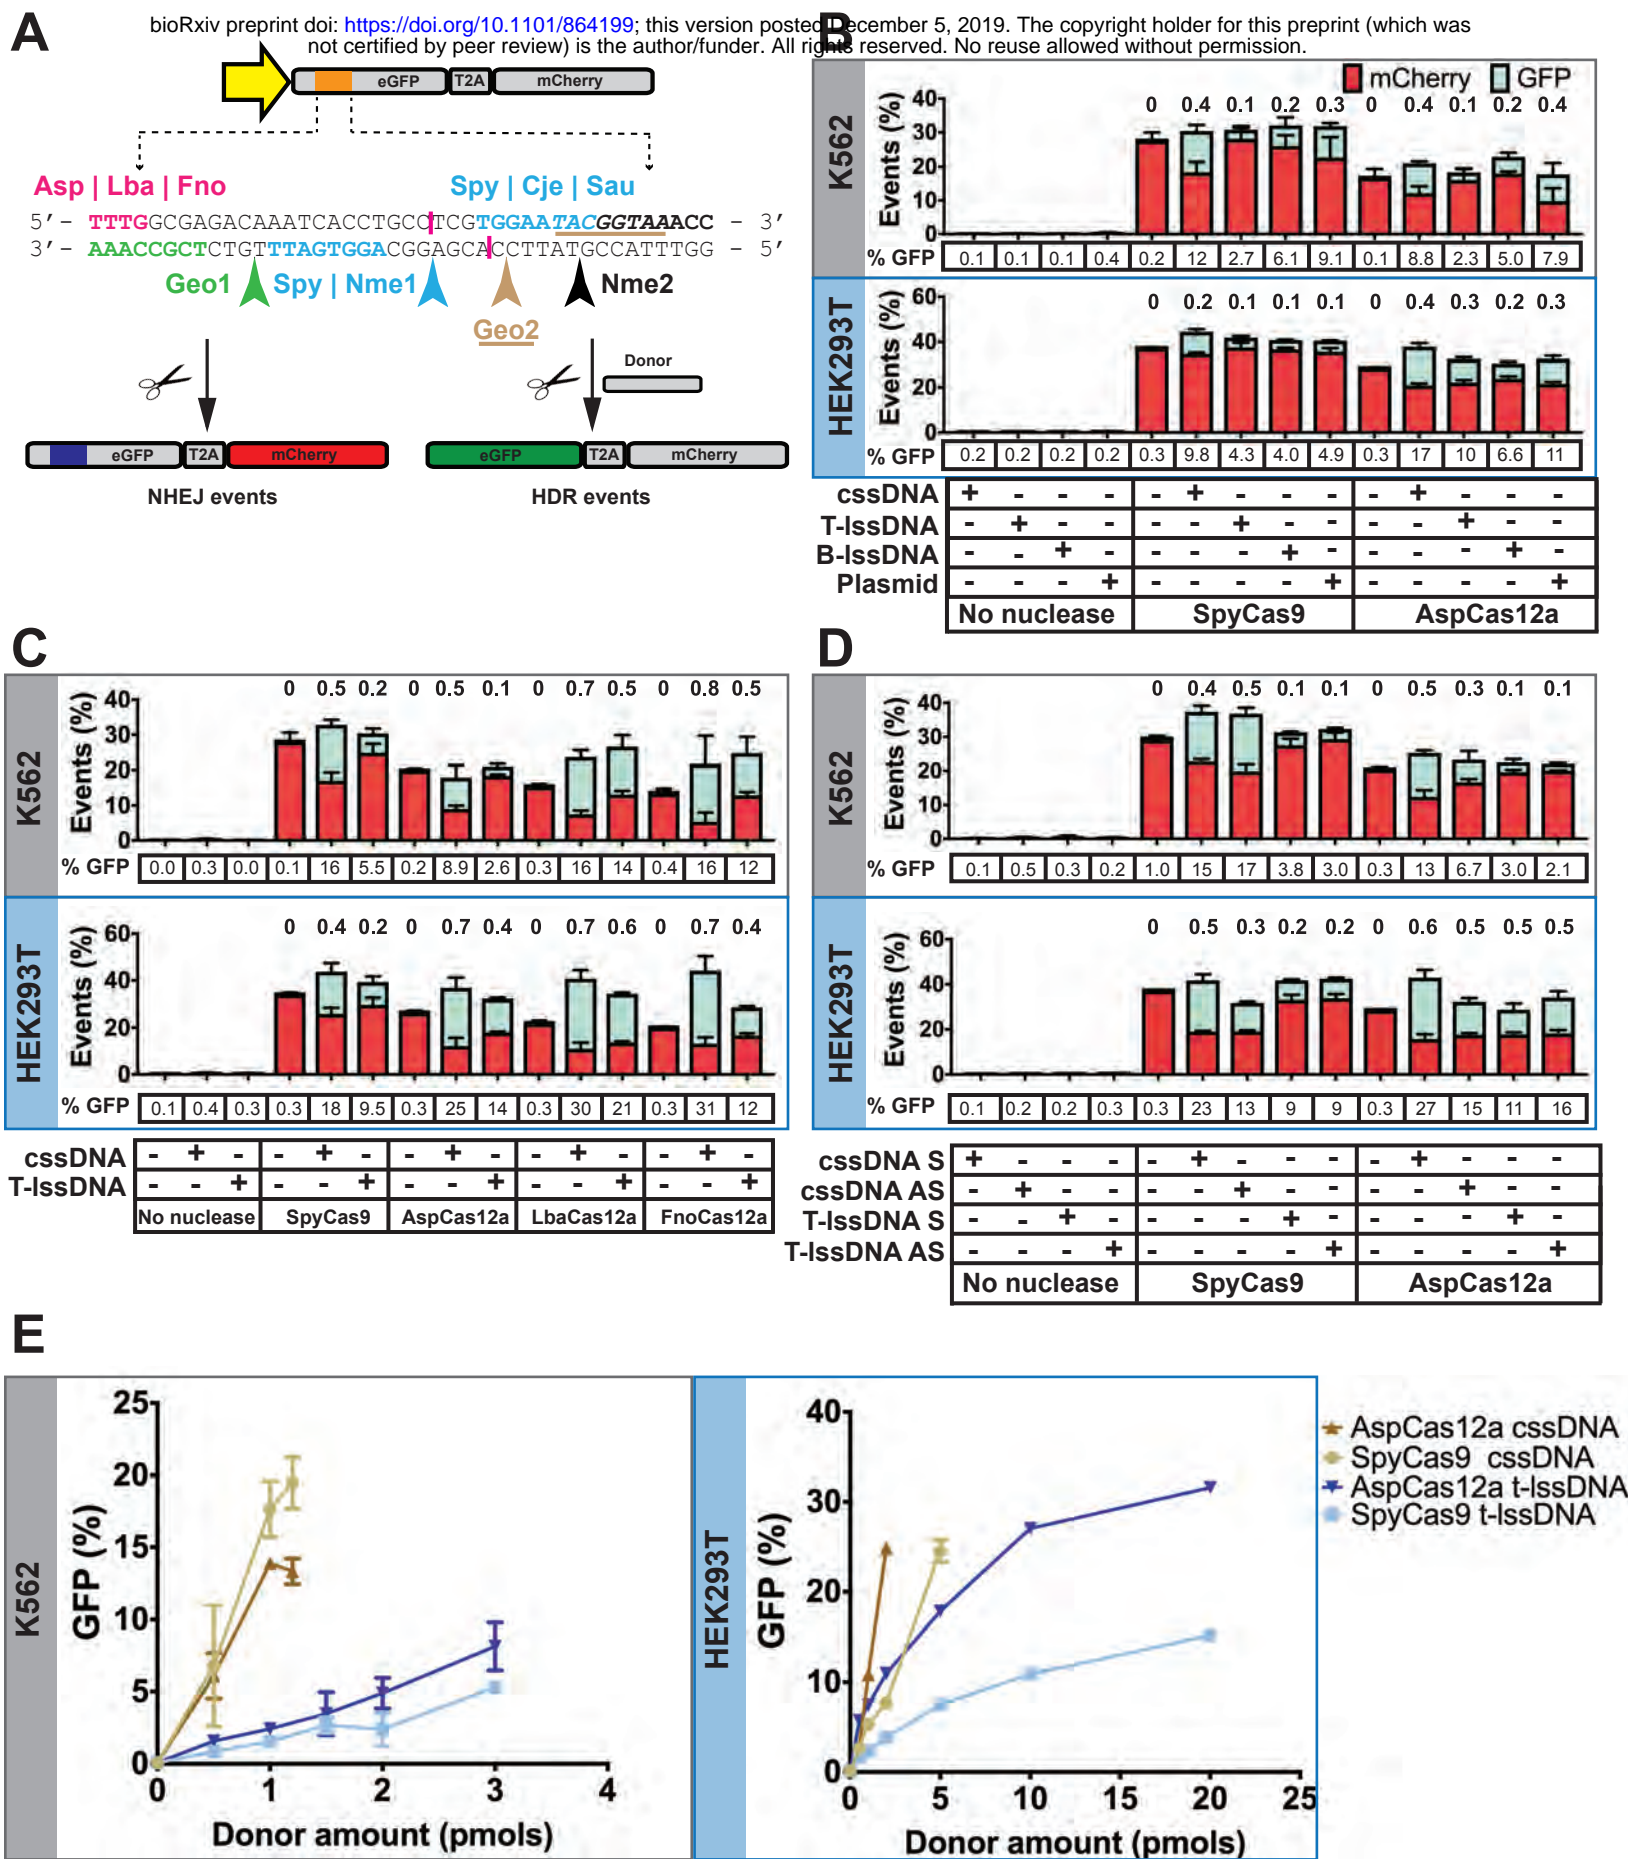

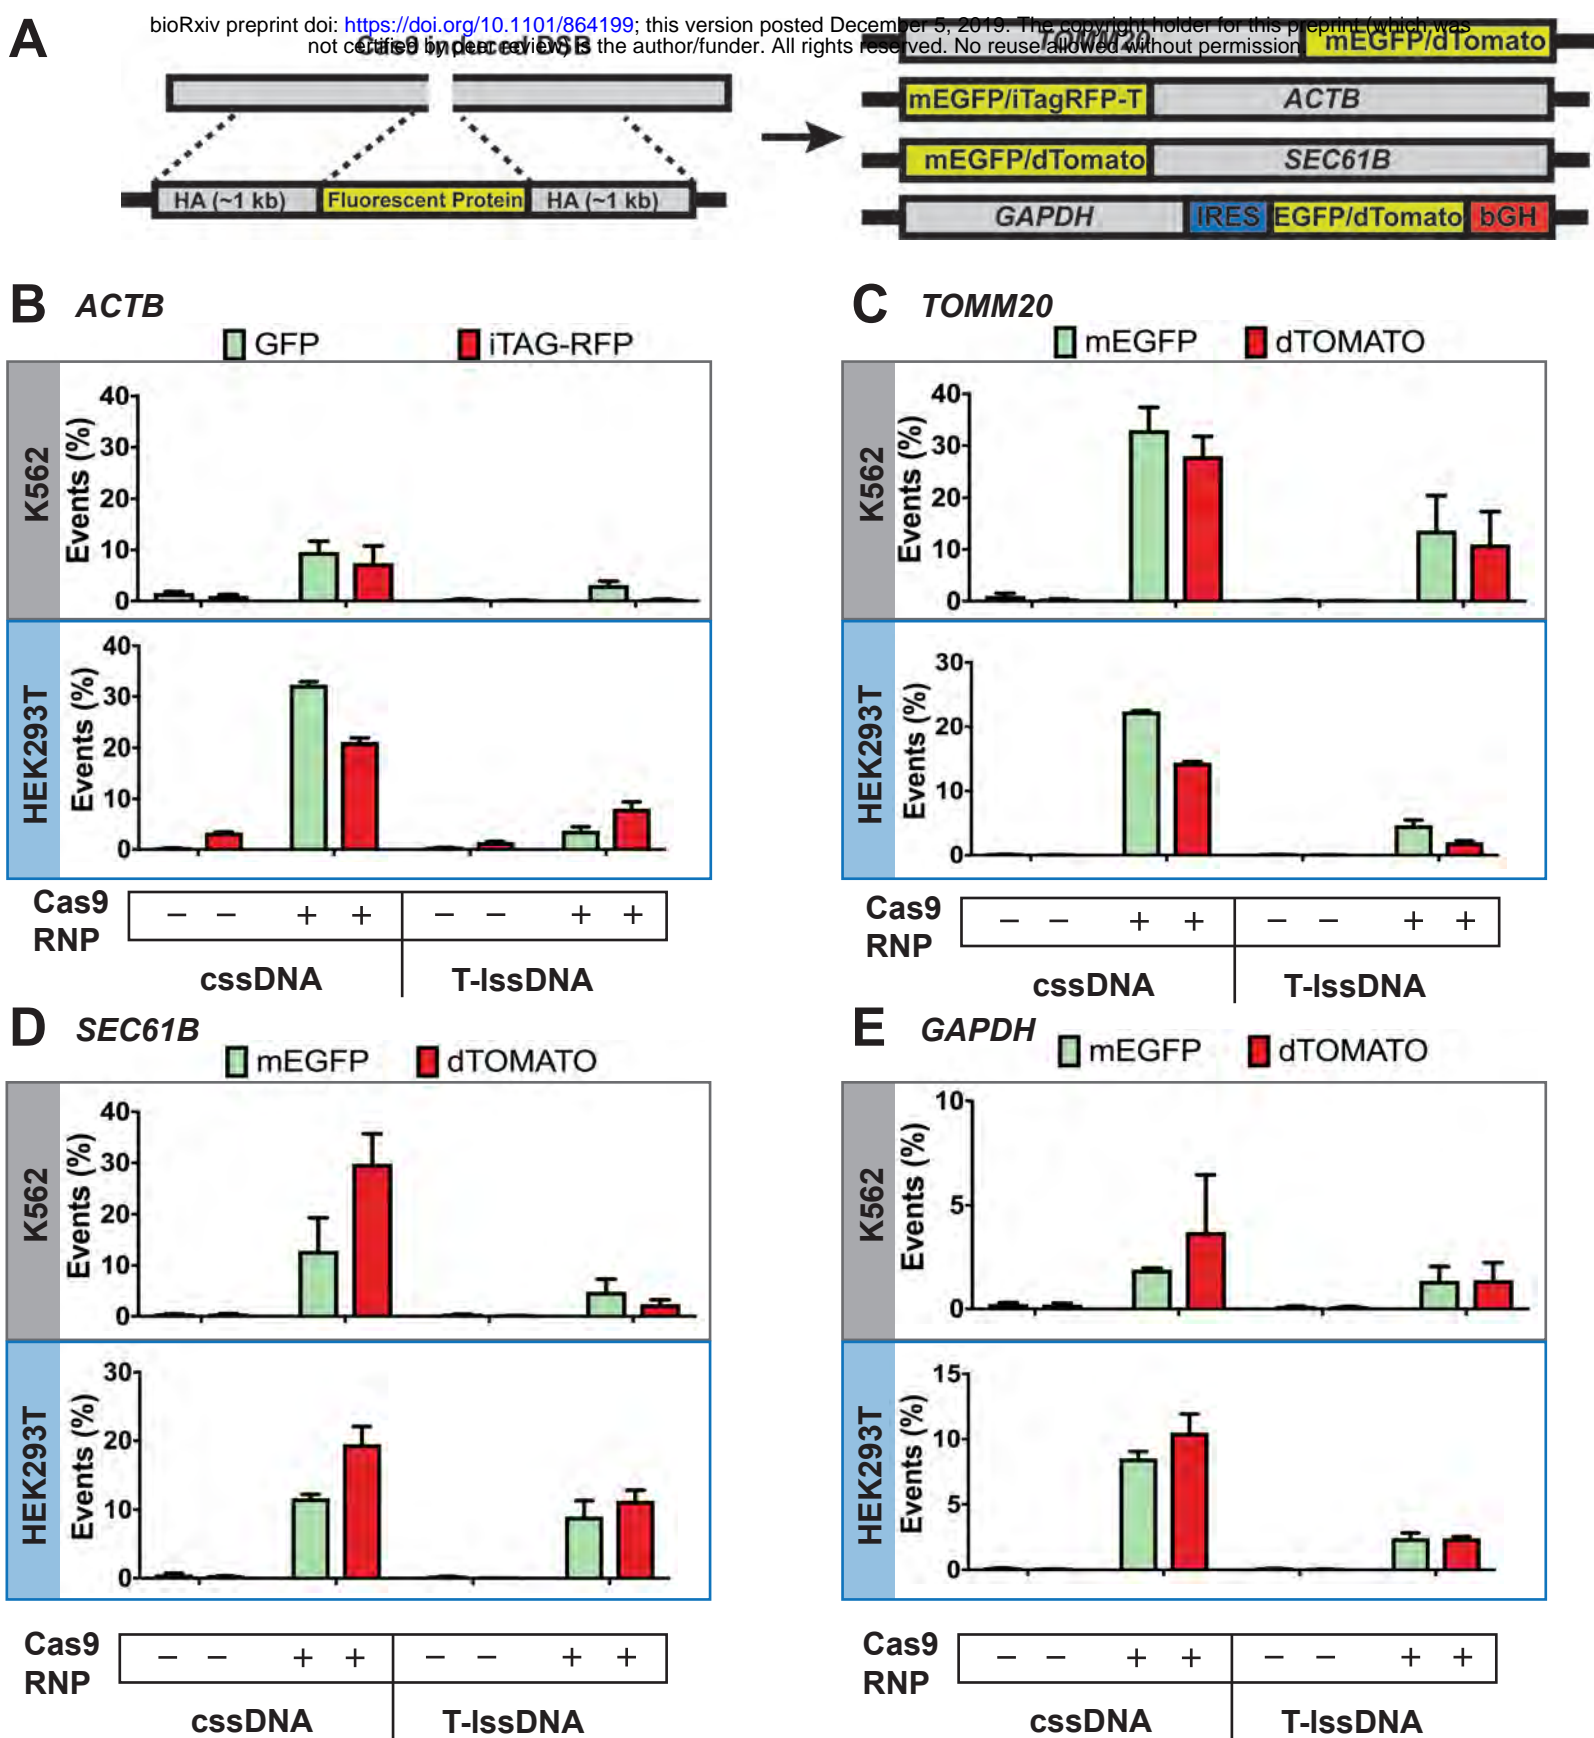

**Figure 2**



**A**

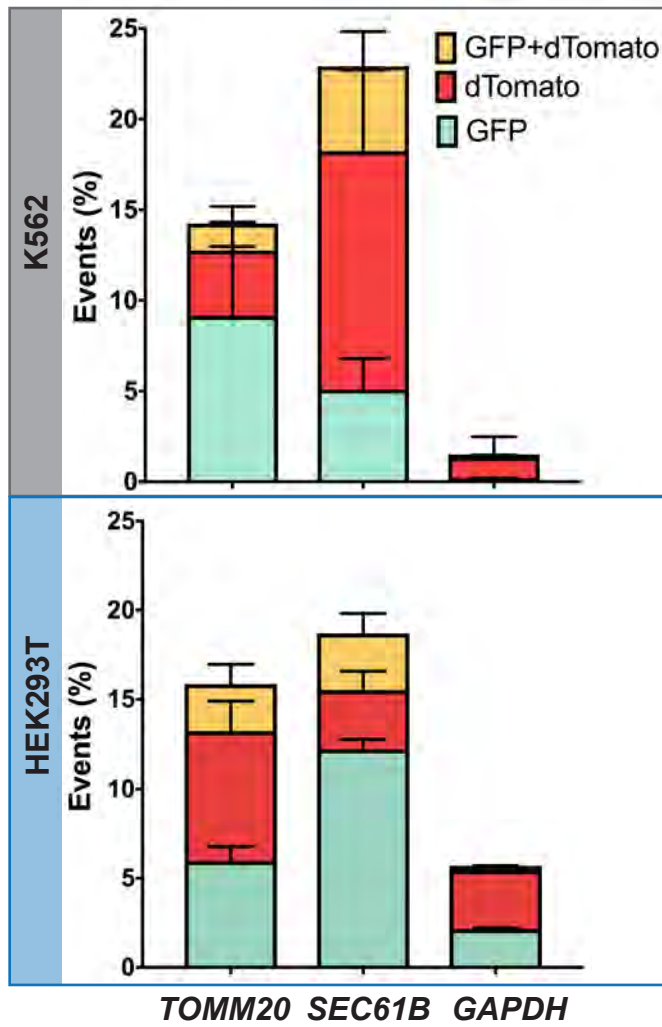

**B**

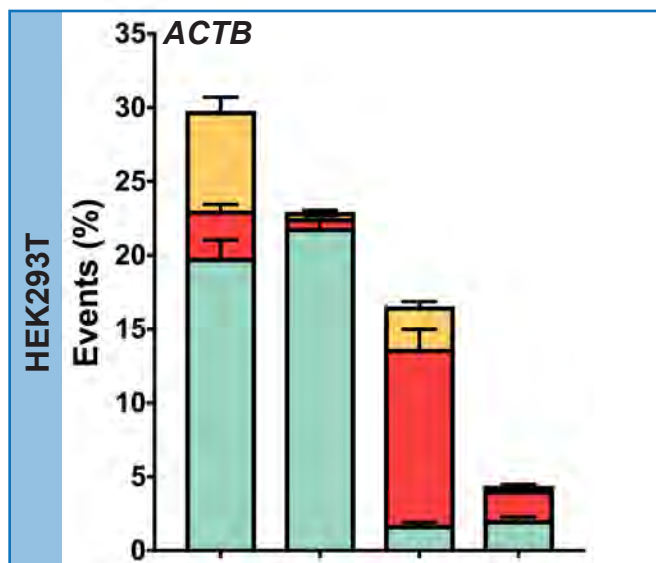

cssDNA mEGFP  
 cssDNA iTAG-RFP  
 T-IssDNA mEGFP  
 T-IssDNA iTAG-RFP

|   |   |   |   |
|---|---|---|---|
| + | + | - | - |
| + | - | + | - |
| - | - | + | + |
| - | + | - | + |

**Figure 3**

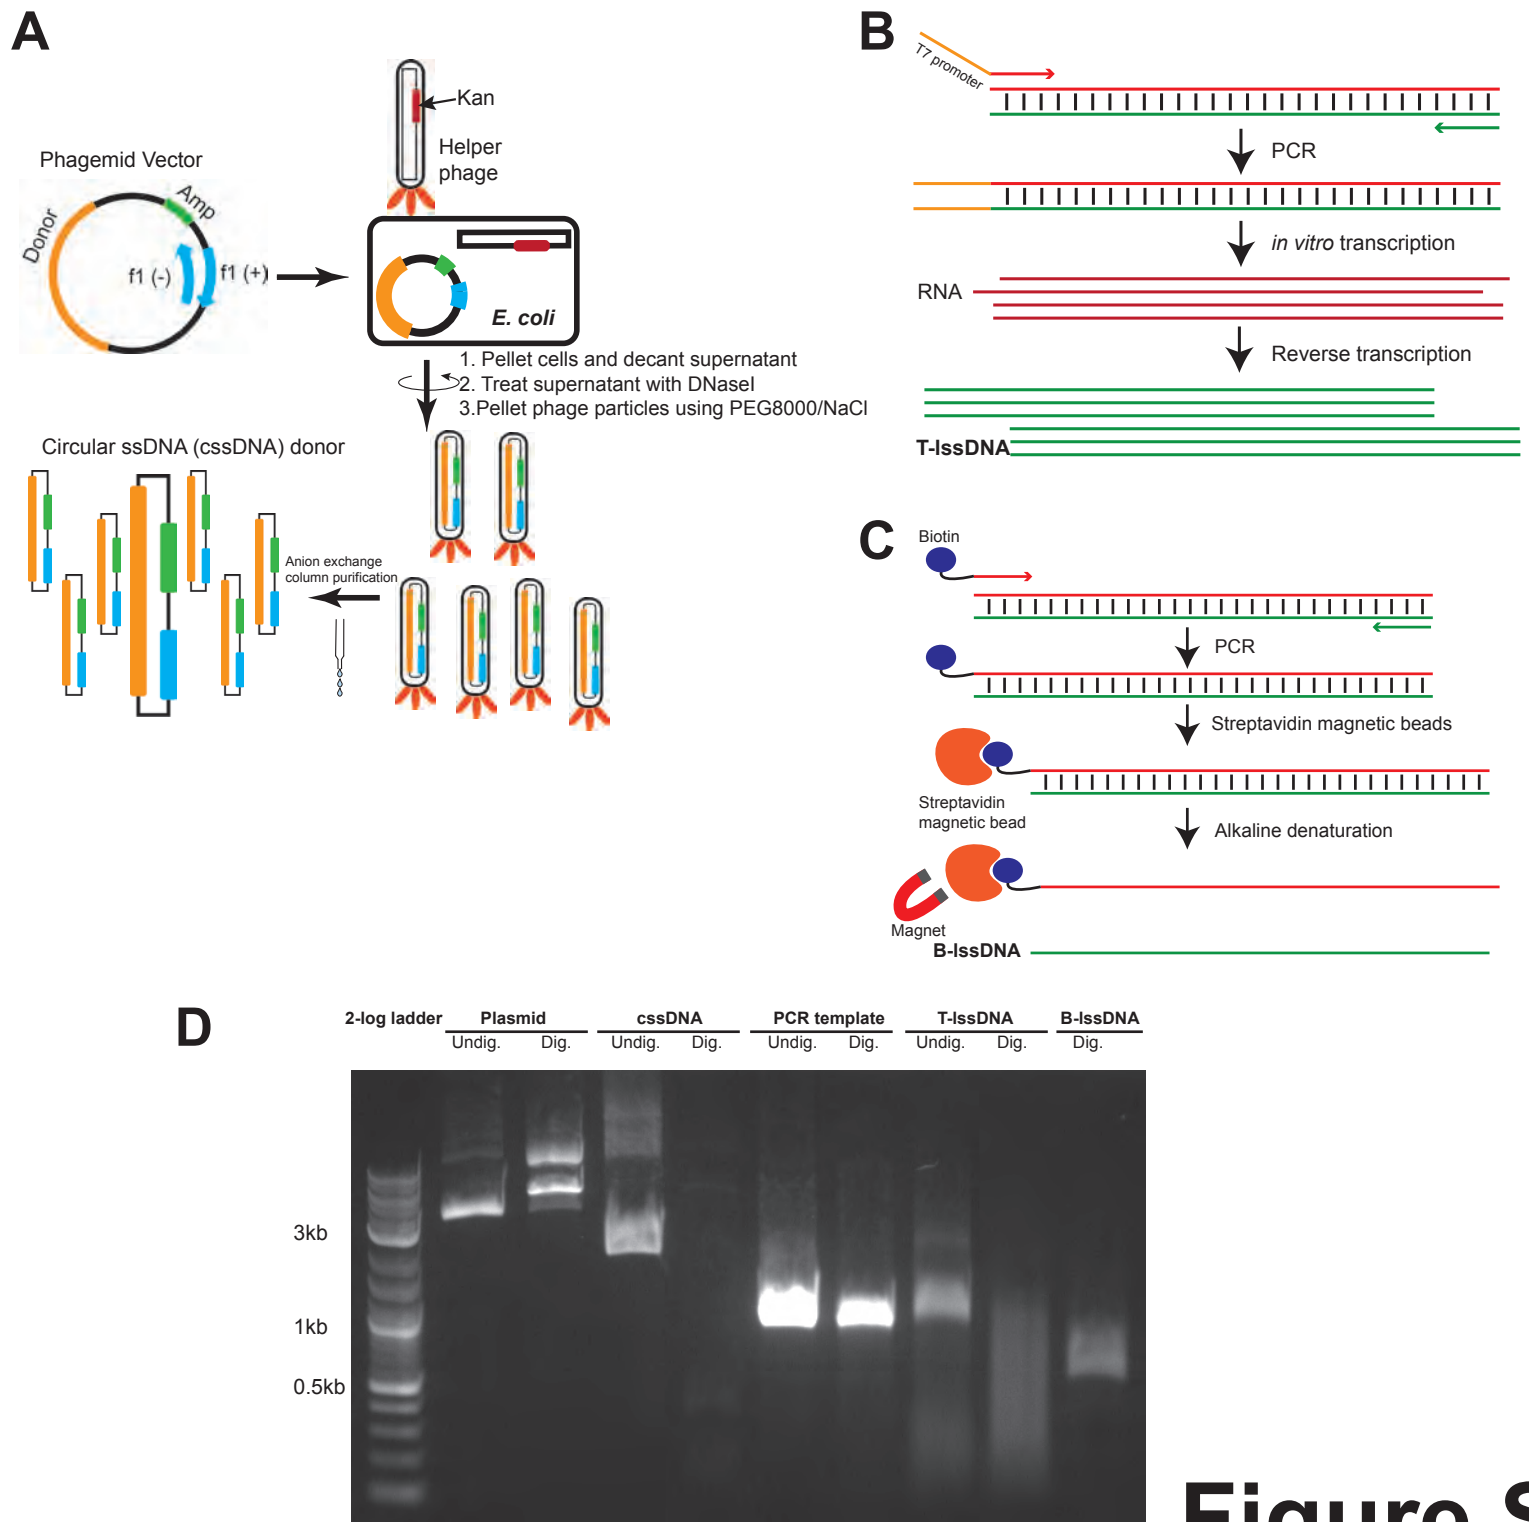

**Figure S1**

A

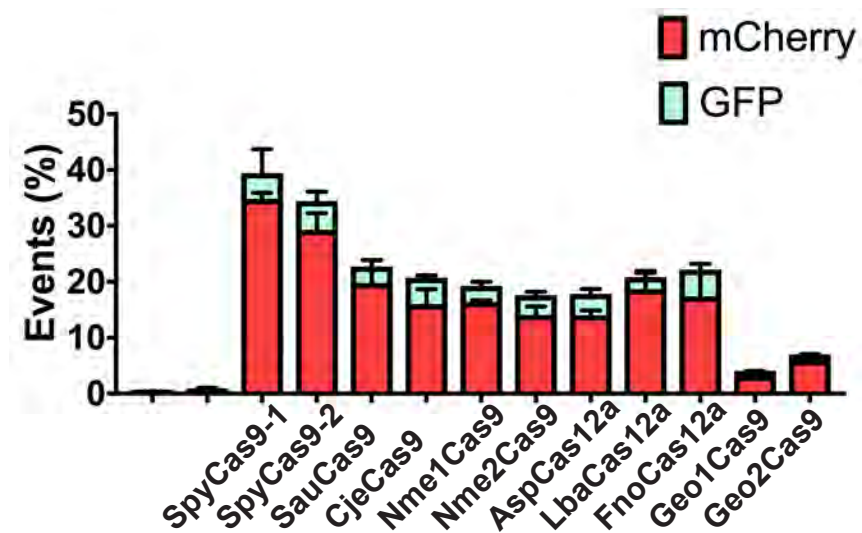

B

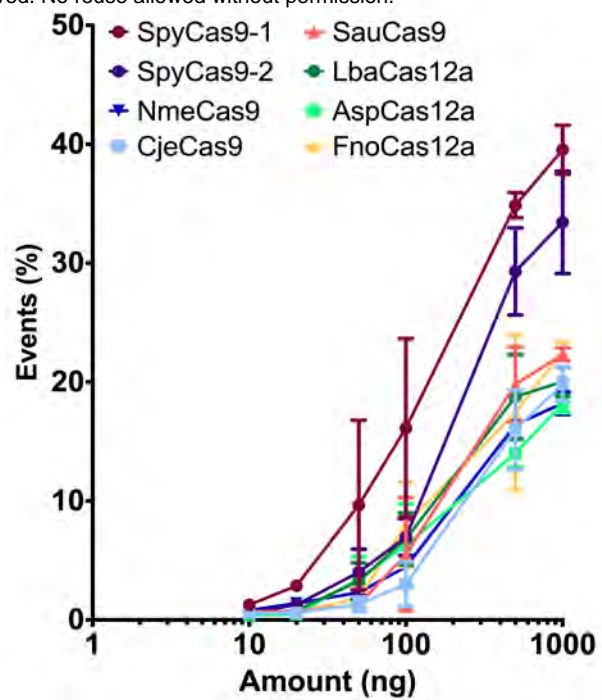

Figure S2

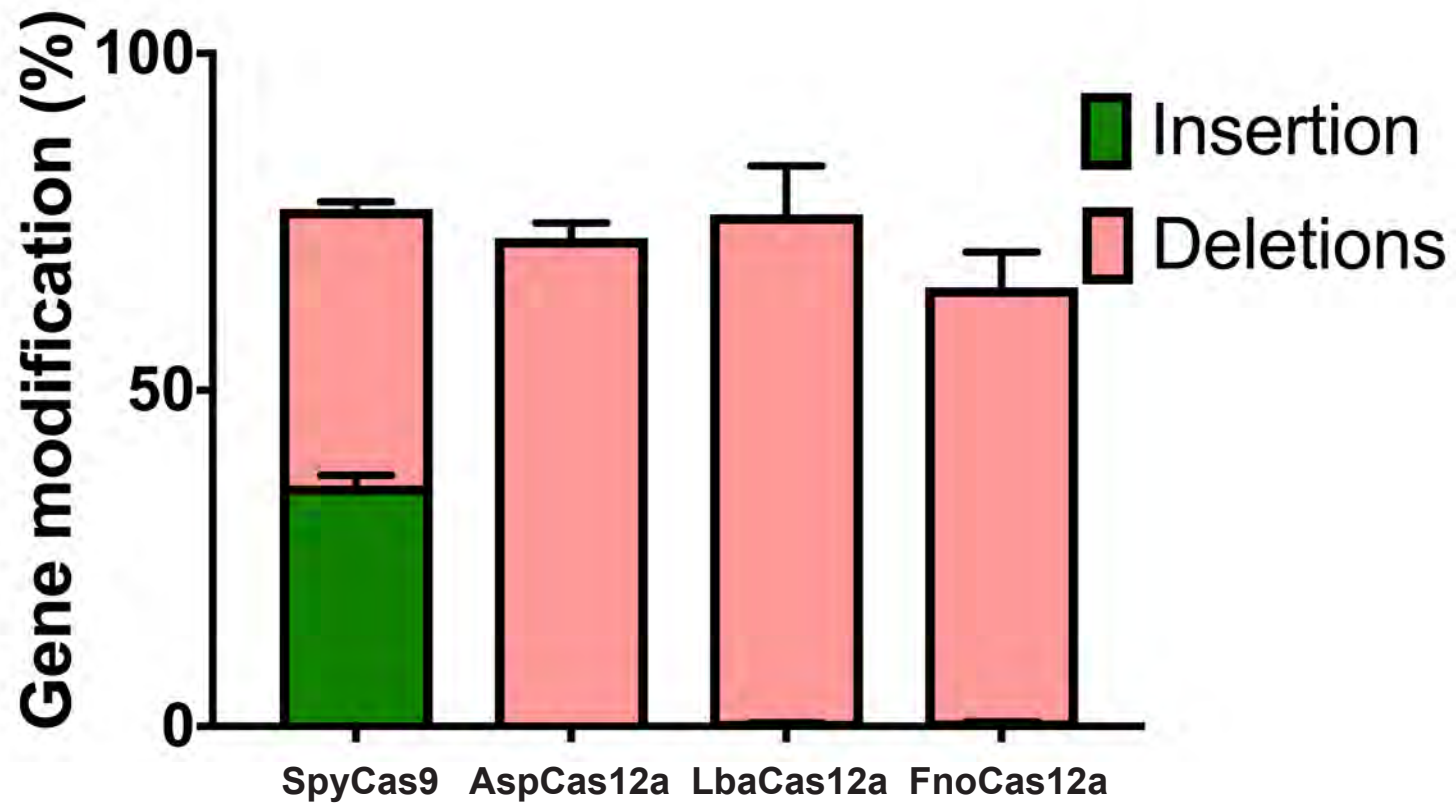

**Figure S3**

A

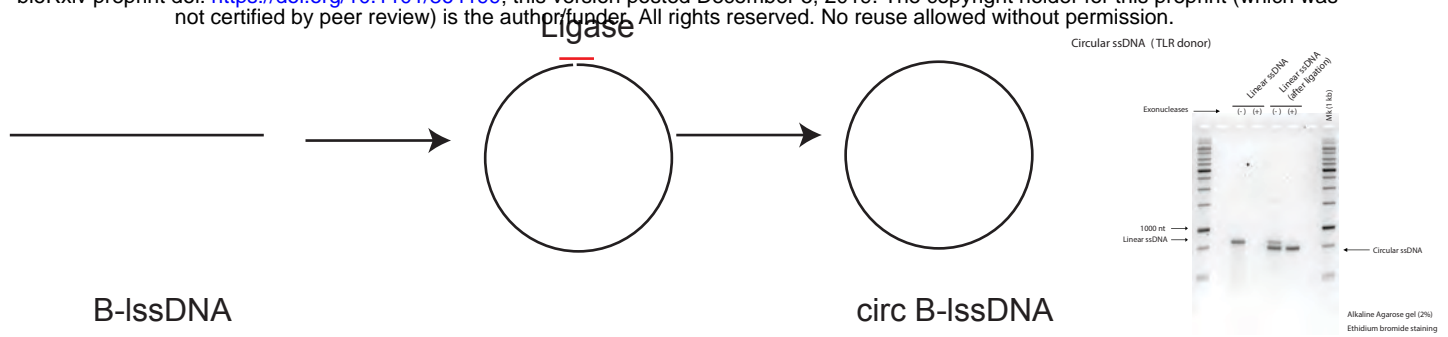

B

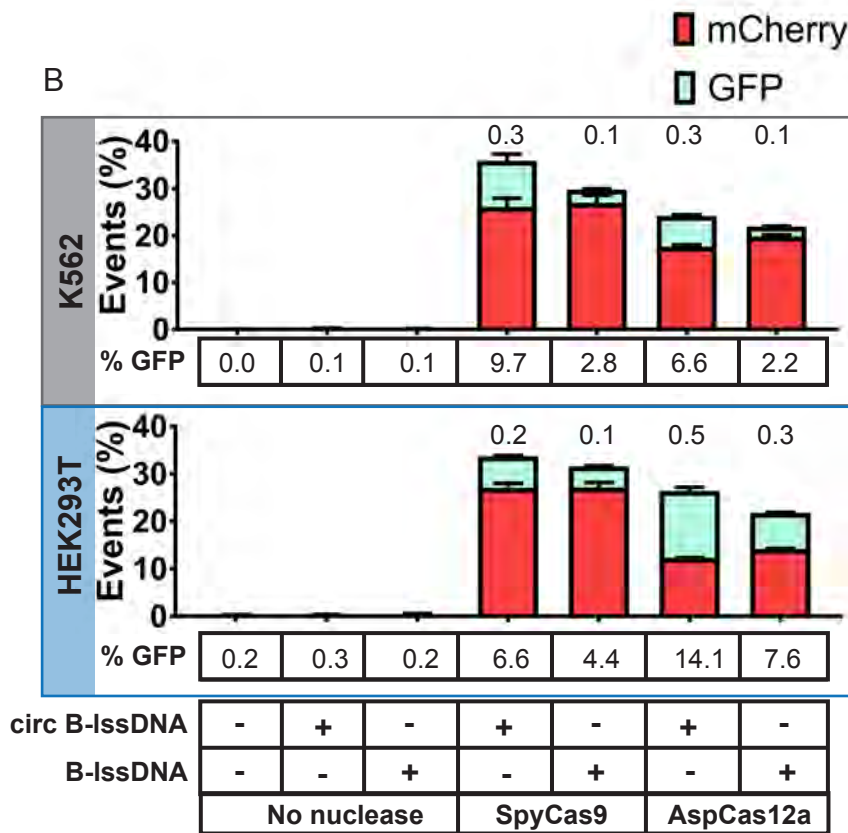

Figure S4



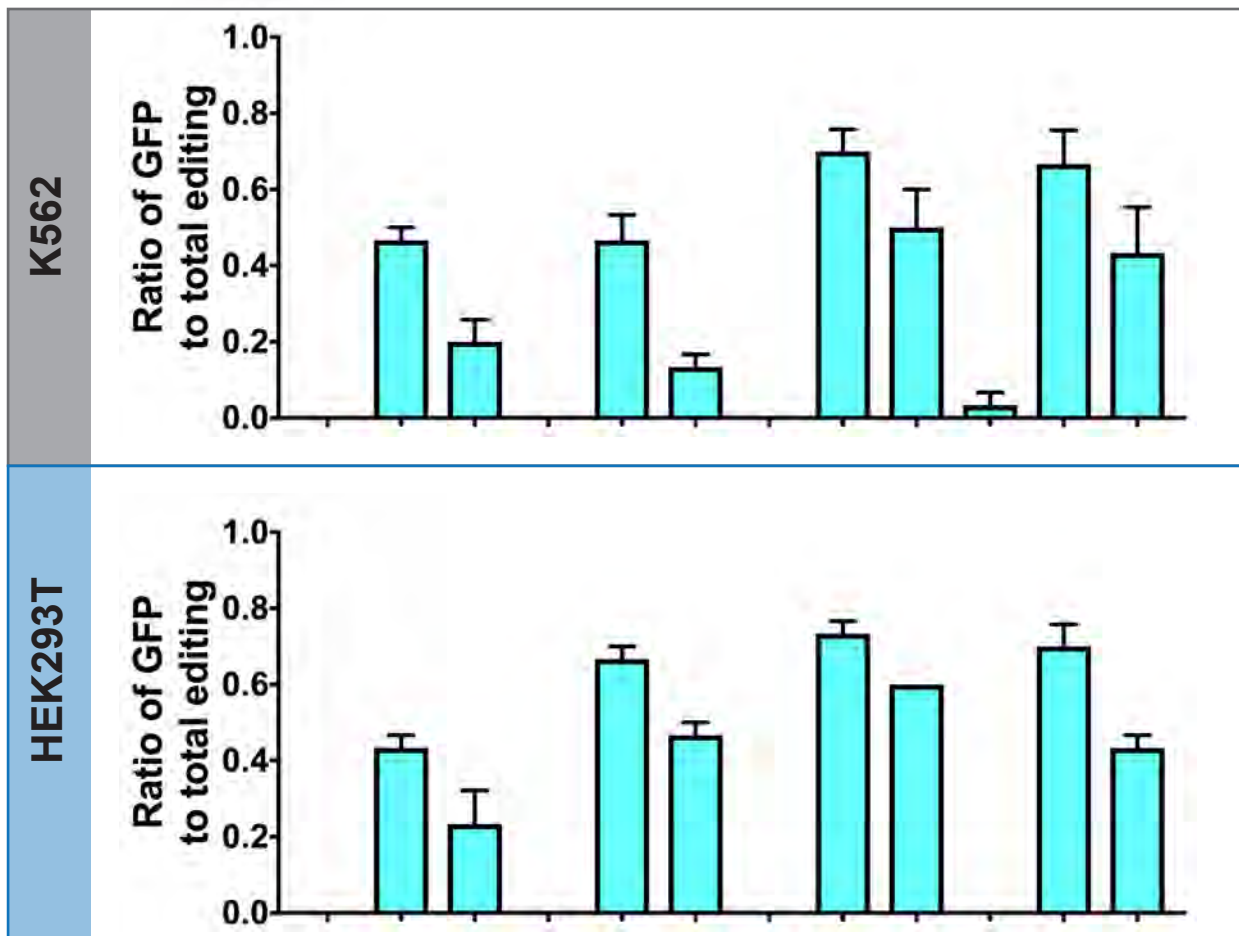

|                 |         |   |   |           |   |   |           |   |   |           |  |  |
|-----------------|---------|---|---|-----------|---|---|-----------|---|---|-----------|--|--|
| <b>cssDNA</b>   | -       | + | - | -         | + | - | -         | + | - |           |  |  |
| <b>T-IssDNA</b> | -       | - | + | -         | - | + | -         | - | + |           |  |  |
|                 | SpyCas9 |   |   | AspCas12a |   |   | LbaCas12a |   |   | FnoCas12a |  |  |

**Figure S5**

**A**

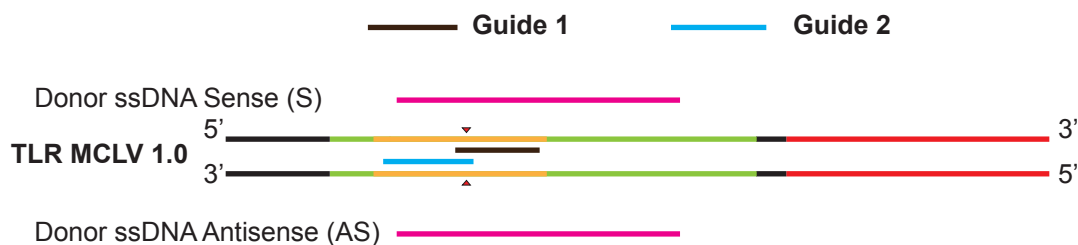

**B**

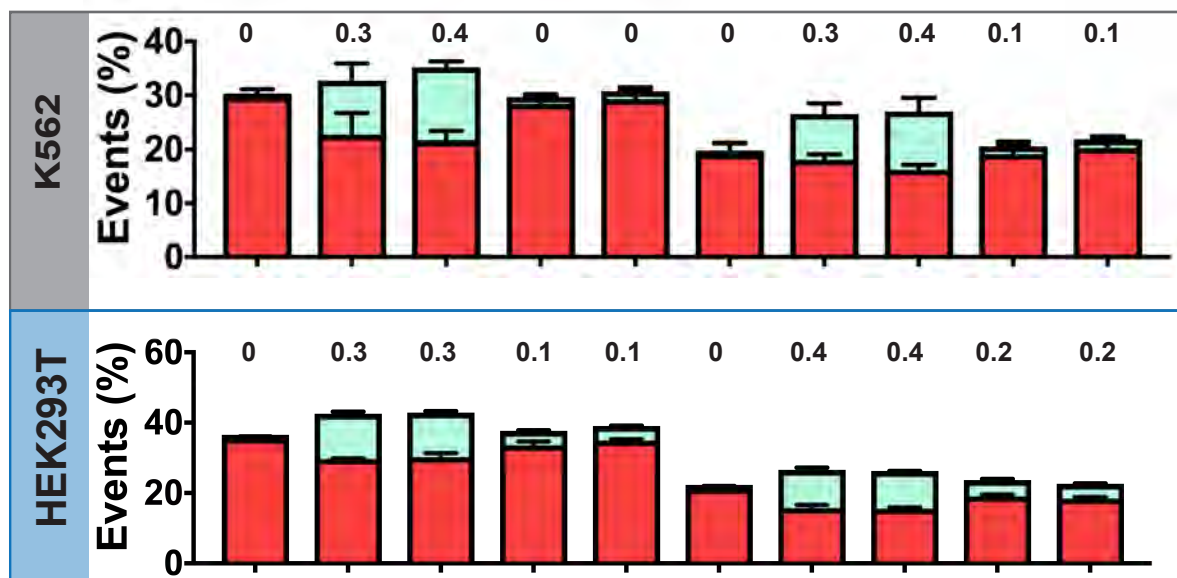

|           |                 |   |   |   |   |                 |   |   |   |   |
|-----------|-----------------|---|---|---|---|-----------------|---|---|---|---|
| cssDNA S  | -               | + | - | - | - | -               | + | - | - | - |
| cssDNA AS | -               | - | + | - | - | -               | - | + | - | - |
| lssDNA S  | -               | - | - | + | - | -               | - | - | + | - |
| lssDNA AS | -               | - | - | - | + | -               | - | - | - | + |
|           | SpyCas9 Guide 1 |   |   |   |   | SpyCas9 Guide 2 |   |   |   |   |

**Figure S6**

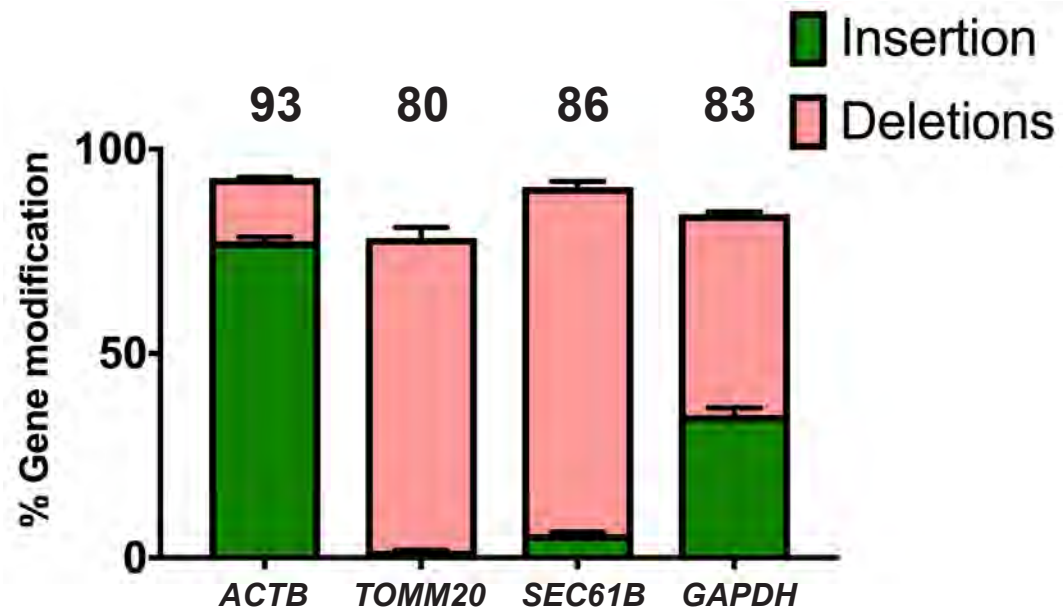

**Figure S7**

**A ACTB**

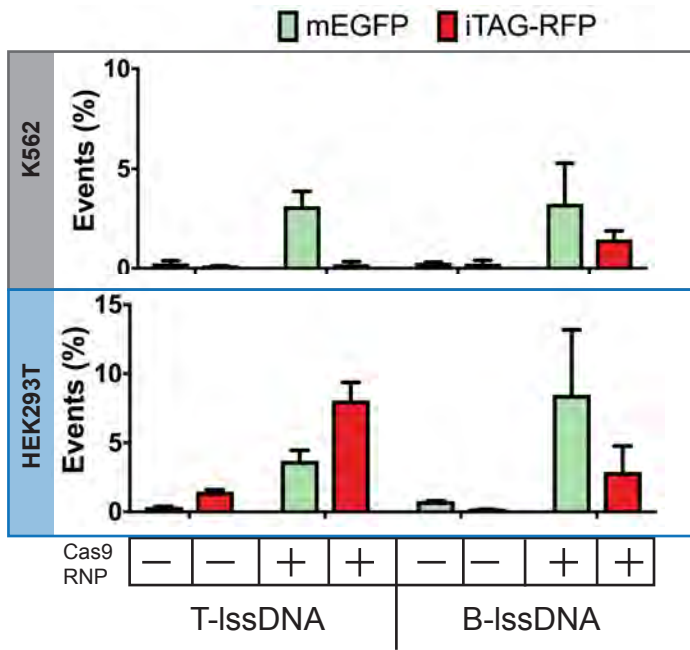

**B TOMM20**

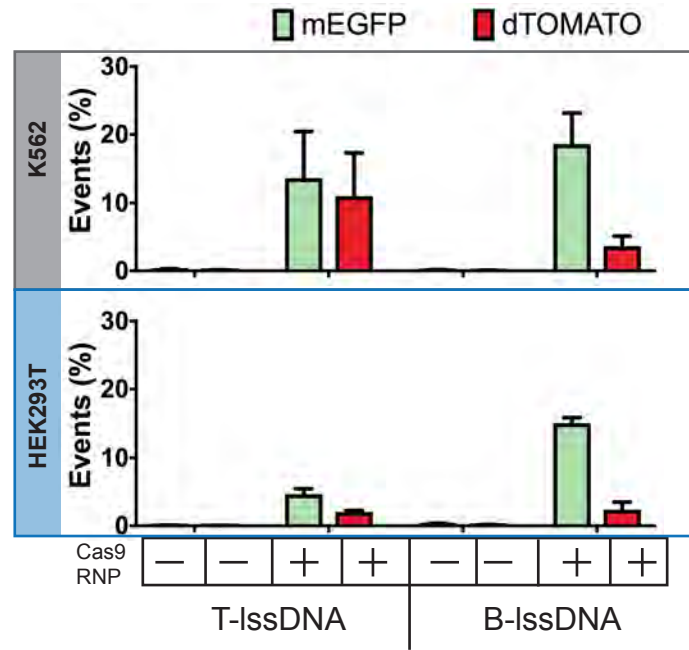

**C SEC61B**

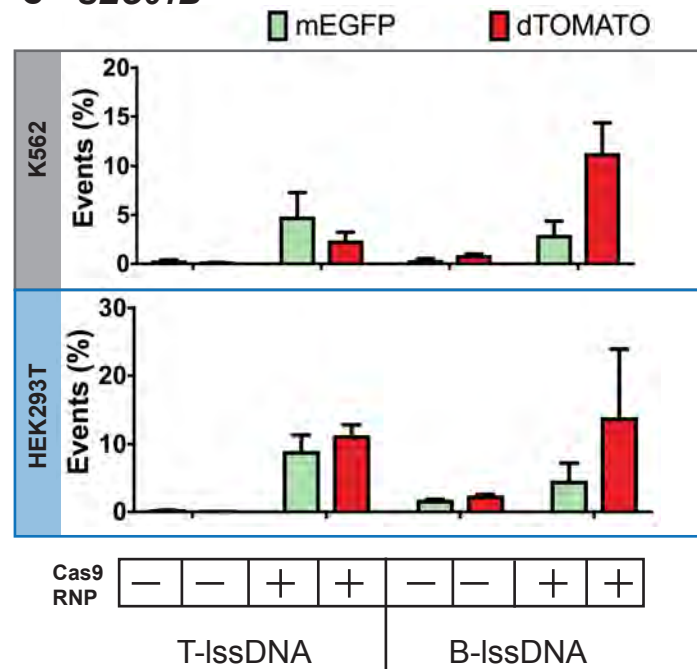

**D GAPDH**

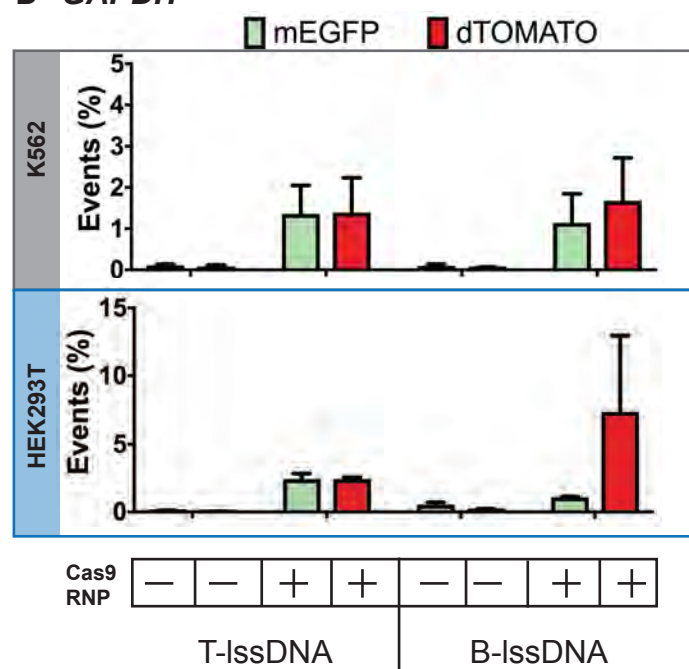

**Figure S8**

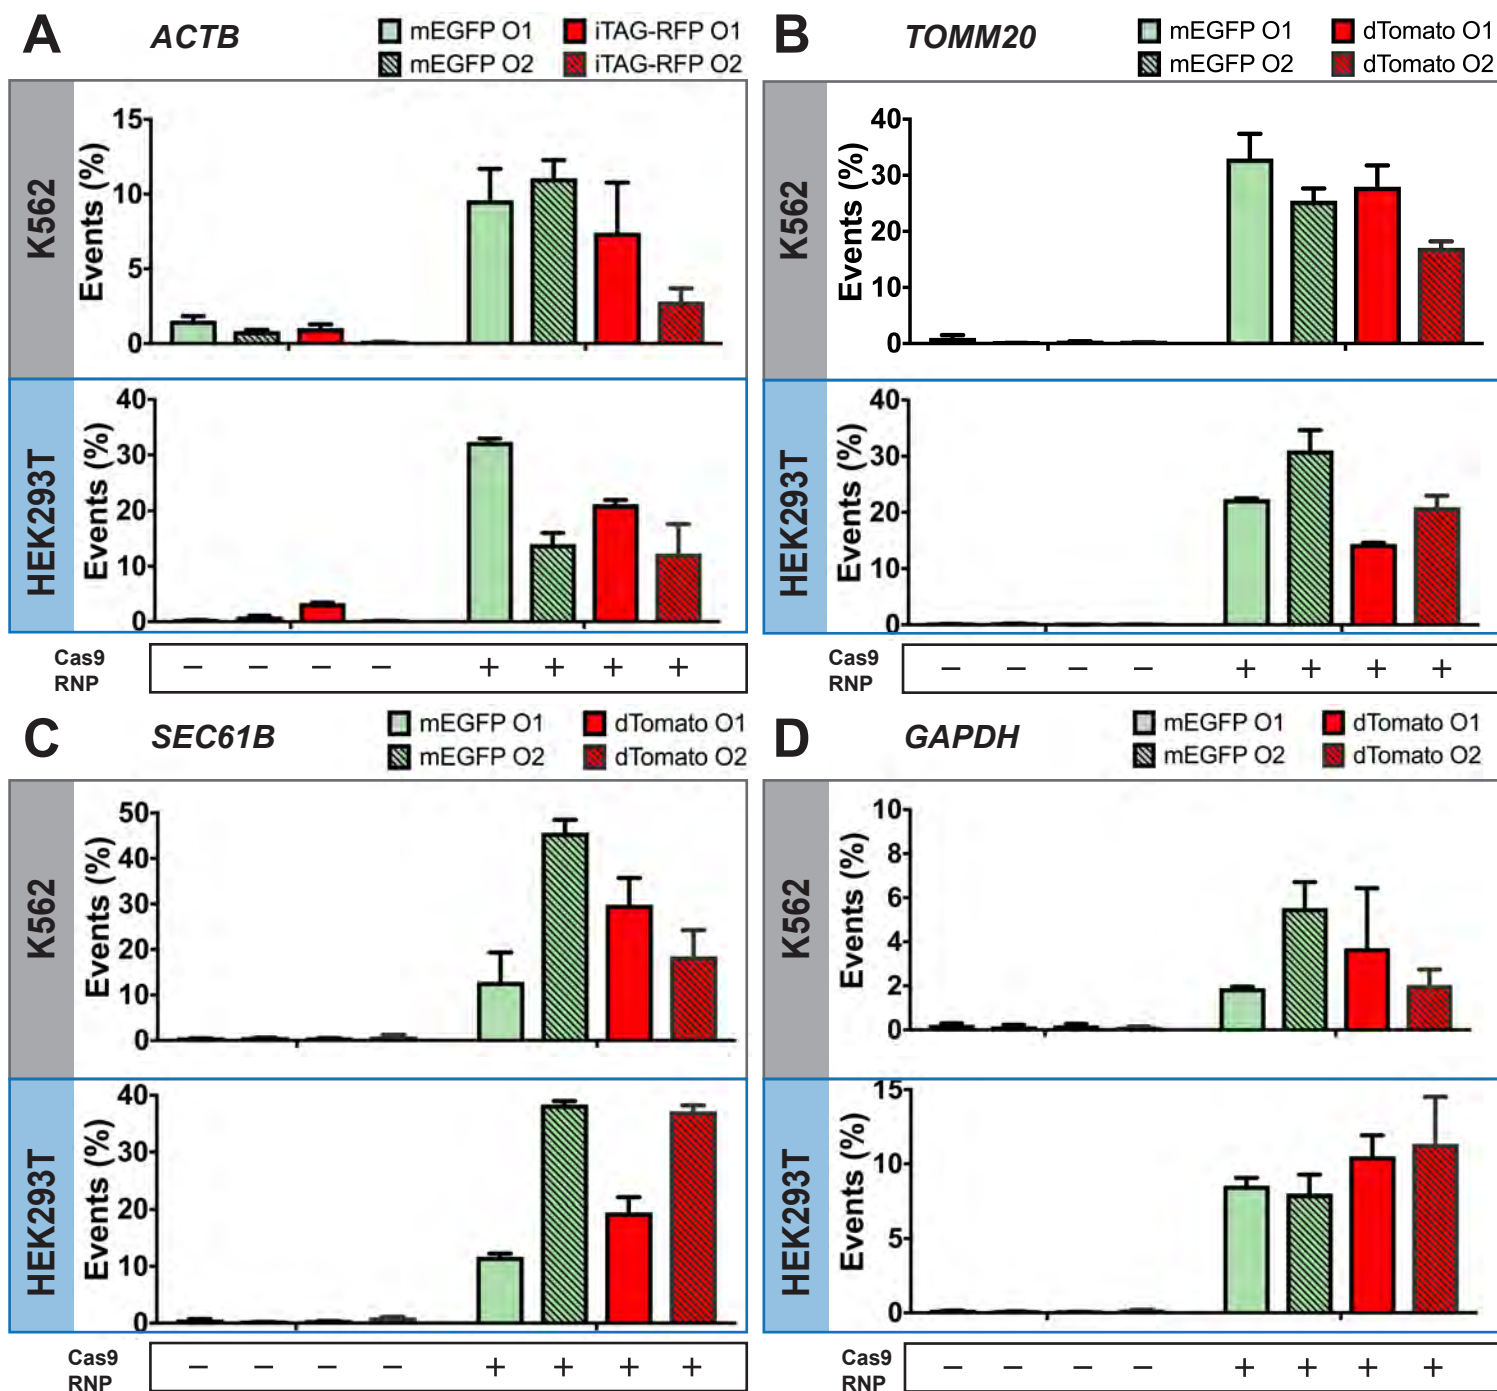

**Figure S9**



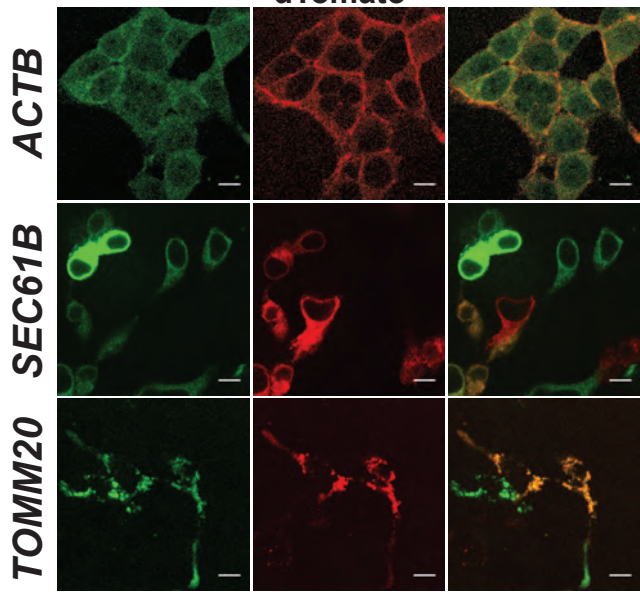

**Figure S10**

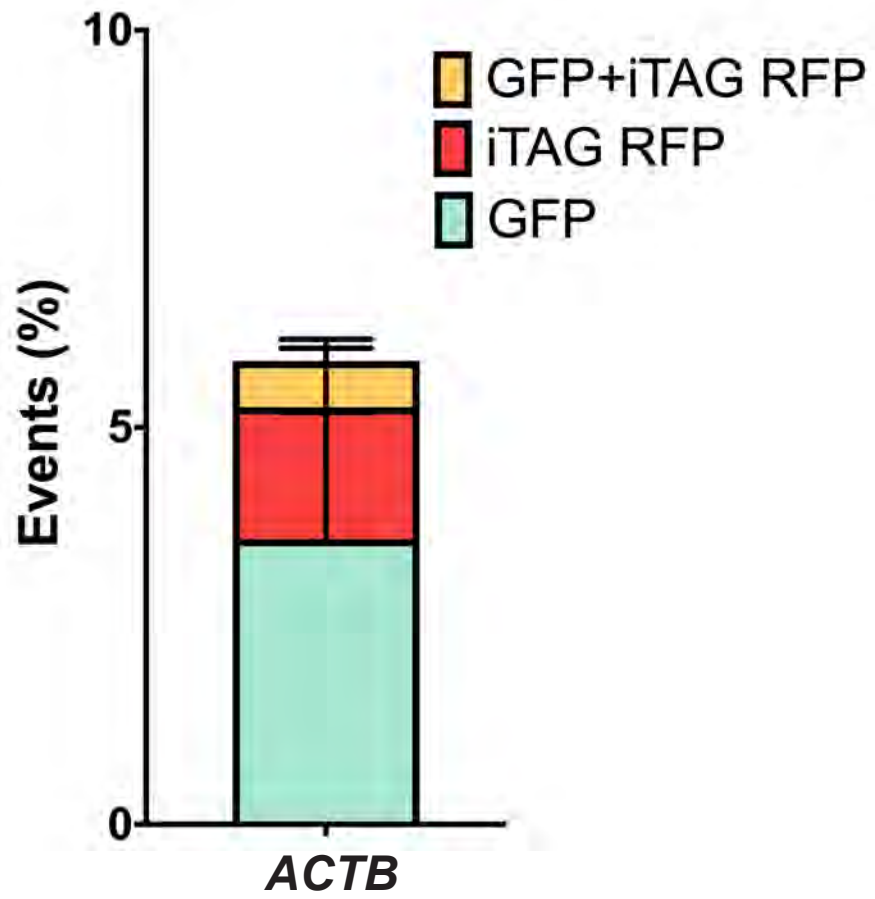

**Figure S11**

1kb  
ladder 5.4kb 6.2kb 8.2kb 13.6kb

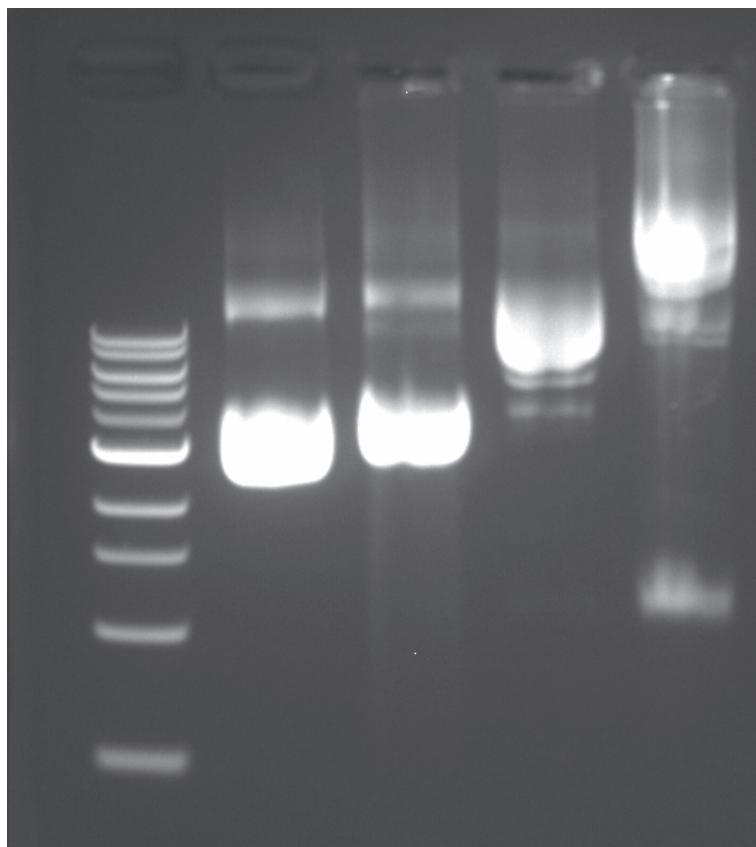

**Figure S12**
